# Supplementary material for: Enantioselective aza-Henry reactions of cyclic α-carbonyl ketimines under bifunctional catalysis
Source: Royal Society of Chemistry journal article supplement (doi:10.1039/c2cc34053d), 2012-01-01
Supplement: c2cc34053d.pdf [file c2cc34053d.pdf]

# A Highly Chemoselective and Enantioselective Aza-Henry Reaction of Cyclic $\alpha$ -Carbonyl Ketimines under Bifunctional Catalysis

Alejandro Parra, Ricardo Alfaro, Leyre Marzo, Alberto Moreno-Carrasco, José Luis García Ruano and José Alemán\*

Department of Organic Chemistry (Módulo-1)  
Universidad Autónoma de Madrid  
Cantoblanco, 28049-Madrid (Spain)  
Fax: (+) 3491497466  
E-mail: [jose.aleman@uam.es](mailto:jose.aleman@uam.es)

## Supporting Information

### Contents

|                                               |     |
|-----------------------------------------------|-----|
| General Methods and Materials                 | S2  |
| Experimental Procedures and Characterizations | S2  |
| Spectra of compounds <b>3a-l</b>              | S8  |
| HPLC chromatograms of compound <b>3a-l</b>    | S22 |
| X-Ray ORTEP of the compound <b>3g</b>         | S35 |

## General Methods

NMR spectra were acquired on a Bruker 300 spectrometer, running at 300 and 75 MHz for  $^1\text{H}$  and  $^{13}\text{C}$ , respectively. Chemical shifts ( $\delta$ ) are reported in ppm relative to residual solvent signals ( $\text{CHCl}_3$ , 7.26 ppm for  $^1\text{H}$  NMR,  $\text{CDCl}_3$ , 77.0 ppm).  $^{13}\text{C}$ -NMR spectra were acquired on a broad band decoupled mode. Analytical thin layer chromatography (TLC) was performed using pre-coated aluminium-backed plates (Merck Kieselgel 60 F254) and visualized by ultraviolet irradiation or  $\text{KMnO}_4$  dip. Purification of reaction products was carried out by flash chromatography (FC) using silica gel Merck-60. Optical rotation was measured on a Perkin-Elmer 241 polarimeter. The enantiomeric excesses (*ee*) of products were determined by chiral stationary phase HPLC (Daicel Chiralcel IC column).

*Materials.* Commercially available nitroalkanes **2**, catalysts **6**, and **7** and solvents were used without further purification. 2-Aryl-3*H*-indol-3-ones **1a-j**,<sup>1</sup> catalysts **4a-e**<sup>2</sup> and **5**<sup>3</sup> were synthesized according to the literature.

### *tert*-Butyl 3-oxo-1'*H*,3*H*-2,3'-biindole-1'-carboxylate (**1j**):

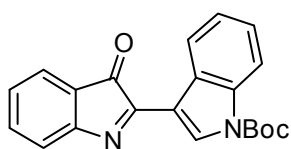

The product was obtained following the reported procedure<sup>1</sup> as red solid (45% yield) after FC (eluent 1/1; hexane/AcOEt).;  $^1\text{H}$ -NMR ( $\text{CDCl}_3$ ):  $\delta$  = 8.68 (s, 1H), 8.50-8.47 (m, 1H), 8.11-8.08 (m, 3H), 6.98 (d,  $J$  = 8.2 Hz, 1H), 6.84 (t,  $J$  = 7.7 Hz, 1H), 5.88 (s, 1H), 7.40 (t,  $J$  = 7.3 Hz, 3H), 7.32-7.28 (m, 3H), 7.08 (t,  $J$  = 7.5 Hz, 1H), 1.63 (s, 9H).  $^{13}\text{C}$ -NMR ( $\text{CDCl}_3$ ):  $\delta$  = 194.1, 162.1, 158.1, 149.0, 136.9, 135.1, 132.3, 128.1, 127.4, 125.7, 125.6, 124.1, 123.3, 122.7, 121.8, 115.2, 111.3, 85.0, 28.1. HRMS: calculated for  $\text{C}_{21}\text{H}_{18}\text{N}_2\text{O}_3$  [ $\text{M}$ ]<sup>+</sup> 346.1317; found 346.1319.

## Experimental Procedures and Characterizations

*General Procedure for the synthesis of compounds 3.* To an ordinary vial charged with corresponding 2-aryl-3*H*-indol-3-ones **1a-i** (0.2 mmol) was added the catalyst **4e** (10 mol%), and the corresponding nitroalkane **3** (2.0 mmol) in *p*-xylene (0.72 mL). The reaction mixture was stirring at room temperature for 48 h. Once the reaction was finished (followed by TLC), the crude was directly charged and purified by FC, affording pure products.

<sup>1</sup> Y. Liu, W. W. McWhorter Jr. *J. Am. Chem. Soc.* 2003, **125**, 4240.

<sup>2</sup> B. Vakulya, V. Szilárd, C. Antal, T. Soós *Org. Lett.* 2005, **7**, 1967

<sup>3</sup> J. P. Malerich, K. Hagihara, V. H. Rawal *J. Am. Chem. Soc.* 2008, **130**, 14416.

### (S)-2-(Nitromethyl)-2-phenylindolin-3-one (3a):

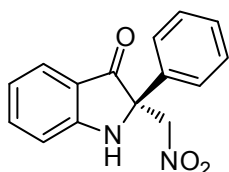

The product was obtained following the standard procedure using catalyst **4e** as yellow oil (90% yield) after FC (eluent 5/1; hexane/AcOEt). The *ee* was determined by HPLC using a Chiralpak IC column [hexane/*i*PrOH (90:10)]; flow rate 1.0 mL/min;  $\tau_{\text{minor}} = 18.2$  min,  $\tau_{\text{major}} = 20.1$  min (*e.r.* = 95:5).  $[\alpha]_{\text{D}}^{20} = -322.0$  ( $c = 0.4$  in  $\text{CHCl}_3$ );  $^1\text{H-NMR}$  ( $\text{CDCl}_3$ ):  $\delta = 7.56\text{--}7.47$  (m, 4H), 7.32–7.29 (m, 3H), 6.98 (d,  $J = 8.2$  Hz, 1H), 6.84 (t,  $J = 7.7$  Hz, 1H), 5.88 (s, 1H), 5.19 (d,  $J = 13.7$  Hz, 1H), 4.75 (d,  $J = 13.7$  Hz, 1H).  $^{13}\text{C-NMR}$  ( $\text{CDCl}_3$ ):  $\delta = 196.2, 160.1, 138.3, 134.4, 129.2, 128.8, 125.8, 125.1, 120.1, 118.3, 112.2, 80.3, 69.2$ . HRMS: calculated for  $\text{C}_{15}\text{H}_{12}\text{N}_2\text{O}_3$   $[\text{M}]^+$  268.0848; found 268.0837.

### (S)-2-(Nitromethyl)-2-(p-tolyl)indolin-3-one (3b):

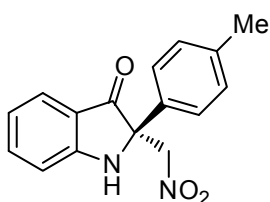

The product was obtained following the standard procedure using catalyst **4e** as yellow oil (93% yield) after F-C (eluent 5/1; hexane/AcOEt). The *ee* was determined by HPLC using a Chiralpak IC column [hexane/*i*PrOH (90:10)]; flow rate 1.0 mL/min;  $\tau_{\text{minor}} = 22.9$  min,  $\tau_{\text{major}} = 19.1$  min (*e.r.* = 91:9).  $[\alpha]_{\text{D}}^{20} = -331.1$  ( $c = 0.35$  in  $\text{CHCl}_3$ );  $^1\text{H-NMR}$  ( $\text{CDCl}_3$ ):  $\delta = 7.50$  (d,  $J = 7.7$  Hz, 1H), 7.44 (td,  $J = 7.0, 1.3$  Hz, 1H), 7.32 (d,  $J = 9.0$  Hz, 2H), 7.08 (d,  $J = 9.0$  Hz, 2H), 6.93 (d,  $J = 8.3$  Hz, 1H), 6.79 (t,  $J = 7.0$  Hz, 1H), 5.80 (s, 1H), 5.12 (d,  $J = 15.0$  Hz, 1H), 4.70 (d,  $J = 15.0$  Hz, 1H), 2.22 (s, 3H).  $^{13}\text{C-NMR}$  ( $\text{CDCl}_3$ ):  $\delta = 196.5, 160.1, 138.7, 138.2, 131.4, 130.0, 125.9, 125.4, 120.4, 118.5, 112.2, 80.2, 69.2, 21.0$ . HRMS: calculated for  $\text{C}_{16}\text{H}_{14}\text{N}_2\text{O}_3$   $[\text{M}]^+$  282.1004; found 282.0996.

### (S)-2-(4-Ethylphenyl)-2-(nitromethyl)indolin-3-one (3c):

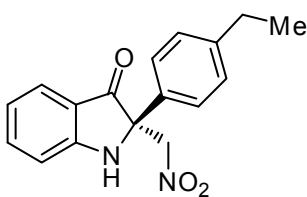

The product was obtained following the standard procedure using catalyst **4e** as yellow oil (93% yield) after F-C (eluent 6/1; hexane/AcOEt). The *ee* was determined by HPLC using a Chiralpak IC column [hexane/*i*PrOH (90:10)]; flow rate 1.0 mL/min;  $\tau_{\text{minor}} = 18.6$  min,  $\tau_{\text{major}} = 22.4$  min (*e.r.* = 92:8).  $[\alpha]_{\text{D}}^{20} = -390.1$  ( $c = 0.15$  in  $\text{CHCl}_3$ );  $^1\text{H-NMR}$  ( $\text{CDCl}_3$ ):  $\delta = 7.51$  (d,  $J = 7.7$  Hz, 1H), 7.48 (td,  $J = 7.0, 1.3$  Hz, 1H), 7.36 (d,  $J = 9.0$  Hz, 2H), 7.13 (d,  $J = 9.0$  Hz, 2H), 6.94 (d,  $J = 8.3$  Hz, 1H), 6.81 (t,  $J = 7.0$  Hz, 1H), 5.77 (s, 1H), 5.40 (d,  $J = 12.0$  Hz, 1H), 4.72 (d,  $J = 12.0$  Hz, 1H), 2.53 (q,  $J = 6.0$  Hz, 2H), 1.12 (t,  $J = 6.0$  Hz, 3H).  $^{13}\text{C-NMR}$  ( $\text{CDCl}_3$ ):  $\delta = 195.9, 159.6, 144.5, 137.7, 131.1, 128.3, 125.3, 124.6, 119.6, 118.0, 111.7, 79.8, 68.7, 27.9, 14.8$ . HRMS: calculated for  $\text{C}_{17}\text{H}_{16}\text{N}_2\text{O}_3$   $[\text{M}]^+$  296.1161; found 296.1153.

**(S)-2-(4-Methoxyphenyl)-2-(nitromethyl)indolin-3-one (3d):**

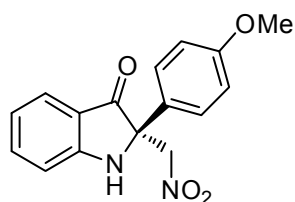

The product was obtained following the standard procedure using catalyst **4e** as yellow oil (95% yield) after FC (eluent 5/1; hexane/AcOEt). The *ee* was determined by HPLC using a Chiralpak ID column [hexane/*i*PrOH (80:20)]; flow rate 1.0 mL/min;  $\tau_{\text{minor}} = 18.6$  min,  $\tau_{\text{major}} = 23.4$  min (*e.r.* = 85:15).  $[\alpha]_{\text{D}}^{20} = -158.4$  ( $c = 0.19$  in  $\text{CHCl}_3$ );  $^1\text{H-NMR}$  ( $\text{CDCl}_3$ ):  $\delta = 7.51$  (d,  $J = 7.7$  Hz, 1H), 7.45 (td,  $J_1 = 7.4$ ,  $J_2 = 0.9$  Hz, 1H), 7.37 (d,  $J = 9.0$  Hz, 2H), 6.80 (d,  $J = 9.0$  Hz, 2H), 6.93 (d,  $J = 8.2$  Hz, 1H), 6.807 (t,  $J = 6.9$  Hz, 1H), 5.79 (s, 1H), 5.10 (d,  $J = 12.0$  Hz, 1H), 4.68 (d,  $J = 12.0$  Hz, 1H), 3.69 (s, 3H).  $^{13}\text{C-NMR}$  ( $\text{CDCl}_3$ ):  $\delta = 196.5$ , 160.0, 138.2, 126.5, 126.2, 125.8, 102.1, 118.5, 114.6 (2C), 112.2, 80.46, 68.7, 55.3. HRMS: calculated for  $\text{C}_{16}\text{H}_{14}\text{N}_2\text{O}_4$   $[\text{M}]^+$  298.0954; found 298.0954.

**(S)-2-(4-Fluorophenyl)-2-(nitromethyl)indolin-3-one (3e):**

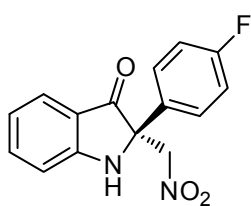

The product was obtained following the standard procedure using catalyst **4e** as yellow oil (93% yield) after FC (eluent 5/1; hexane/AcOEt). The *ee* was determined by HPLC using a Chiralpak IC column [hexane/*i*PrOH (90:10)]; flow rate 1.0 mL/min;  $\tau_{\text{minor}} = 15.0$  min,  $\tau_{\text{major}} = 13.2$  min (*e.r.* = 91:9).  $[\alpha]_{\text{D}}^{20} = -415.6$  ( $c = 0.14$  in  $\text{CH}_2\text{Cl}_2$ );  $^1\text{H-NMR}$  ( $\text{CDCl}_3$ ):  $\delta = 7.53$ -7.46 (m, 4H), 6.98 (t,  $J = 8.51$  Hz, 3H), 6.83 (t,  $J = 7.55$  Hz, 1H), 5.88 (s, 1H), 5.12 (d,  $J = 15.0$  Hz, 1H), 4.63 (d,  $J = 15.0$  Hz, 1H).  $^{13}\text{C-NMR}$  ( $\text{CDCl}_3$ ):  $\delta = 196.0$ , 164.7, 160.9 (d,  $J_{\text{C-F}} = 426$  Hz), 138.6, 130.1 (d,  $J_{\text{C-F}} = 12.0$  Hz), 127.2 (d,  $J_{\text{C-F}} = 36.0$  Hz), 125.9, 120.4, 118.2, 116.1 (d,  $J_{\text{C-F}} = 87$  Hz), 112.3, 80.5, 68.7. HRMS: calculated for  $\text{C}_{15}\text{H}_{11}\text{FN}_2\text{O}_3$   $[\text{M}]^+$  286.0754; found 286.0765.

**(S)-2-(4-Chlorophenyl)-2-(nitromethyl)indolin-3-one (3f):**

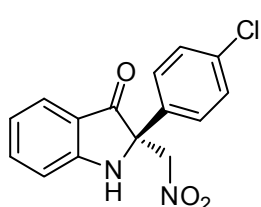

The product was obtained following the standard procedure using catalyst **4e** as yellow oil (81% yield) after FC (eluent 5/1; hexane/AcOEt). The *ee* was determined by HPLC using a Chiralpak IC column [hexane/*i*PrOH (90:10)]; flow rate 1.0 mL/min;  $\tau_{\text{minor}} = 14.2$  min,  $\tau_{\text{major}} = 12.3$  min (*e.r.* = 93:7).  $[\alpha]_{\text{D}}^{20} = -305.1$  ( $c = 0.4$  in  $\text{CHCl}_3$ );  $^1\text{H-NMR}$  ( $\text{CDCl}_3$ ):  $\delta = 7.52$ -7.41 (m, 2H), 7.44 (d,  $J = 9.0$  Hz, 2H), 7.26 (d,  $J = 9.0$  Hz, 2H), 6.97 (d,  $J = 8.2$  Hz, 1H), 6.83 (t,  $J = 7.5$  Hz, 1H), 5.89 (s, 1H), 5.12 (d,  $J = 15.0$  Hz, 1H), 4.63 (d,  $J = 15.0$  Hz, 1H).  $^{13}\text{C-NMR}$  ( $\text{CDCl}_3$ ):  $\delta = 195.7$ , 160.1, 138.6, 135.1, 133.0, 129.3, 126.7, 125.9, 120.4, 118.0, 112.4, 80.3, 68.8. HRMS: calculated for  $\text{C}_{15}\text{H}_{11}\text{N}_2\text{O}_3\text{Cl}$   $[\text{M}]^+$  302.0458; found 302.0468.

**(S)-2-(2-Bromophenyl)-2-(nitromethyl)indolin-3-one (3g):**

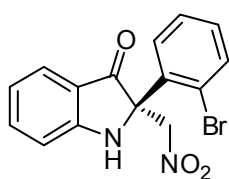

The product was obtained following the standard procedure using catalyst **4e** as yellow solid (81% yield) after FC (eluent 7/1; hexane/AcOEt). The *ee* was determined by HPLC using a Chiralpak IC column [hexane/*i*PrOH (90:10)]; flow rate 1.0 mL/min;  $\tau_{\text{minor}} = 21.7$  min,  $\tau_{\text{major}} = 24.1$  min (*e.r.* = 2:98).  $[\alpha]_{\text{D}}^{20} = -346.7$  ( $c = 0.15$  in  $\text{CHCl}_3$ ). Mp: 198-200 °C.  $^1\text{H-NMR}$  ( $\text{CDCl}_3$ ):  $\delta = 7.69$  (d,  $J = 9.0$  Hz, 1H), 7.64- 7.61 (m, 1H), 7.48 (m, 2H), 7.25 (m, 2H), 6.87-6.81 (m, 2H), 6.24 (s, 1H), 5.45 (d,  $J = 12.0$  Hz, 1H), 4.96 (d,  $J = 12.0$  Hz, 1H).  $^{13}\text{C-NMR}$  ( $\text{CDCl}_3$ ):  $\delta = 195.9, 158.9, 137.0, 134.8, 131.5, 129.7, 128.9, 127.9, 124.1, 121.7, 119.4, 119.2, 111.9, 76.9, 68.8$ . HRMS: calculated for  $\text{C}_{15}\text{H}_{11}\text{BrN}_2\text{O}_3$   $[\text{M}]^+$  345.9953; found 345.9939.

**(S)-2-(Naphthalen-2-yl)-2-(nitromethyl)indolin-3-one (3h):**

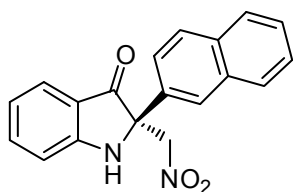

The product was obtained following the standard procedure using catalyst **4e** as yellow oil (>99% yield) after FC (eluent 5/1; hexane/AcOEt). The *ee* was determined by HPLC using a Chiralpak IC column [hexane/*i*PrOH (90:10)]; flow rate 1.0 mL/min;  $\tau_{\text{minor}} = 20.6$  min,  $\tau_{\text{major}} = 23.8$  min (*e.r.* = 92:8).  $[\alpha]_{\text{D}}^{20} = -341.0$  ( $c = 1.0$  in  $\text{CH}_2\text{Cl}_2$ );  $^1\text{H-NMR}$  ( $\text{CDCl}_3$ ):  $\delta = 7.99$  (d,  $J = 1.8$  Hz, 1H), 7.84 (d,  $J = 8.8$  Hz, 1H), 7.81-7.79 (m, 2H), 7.64 (dd,  $J = 8.7, 2.0$  Hz, 1H), 7.60 (d,  $J = 7.9$  Hz, 1H), 7.59-7.53 (m, 1H), 7.51-7.45 (m, 2H), 7.07 (d,  $J = 8.2$  Hz, 1H), 6.70 (t,  $J = 7.7$  Hz, 1H), 6.05 (s, 1H), 5.35 (d,  $J = 15.0$  Hz, 1H), 4.87 (d,  $J = 15.0$  Hz, 1H).  $^{13}\text{C-NMR}$  ( $\text{CDCl}_3$ ):  $\delta = 196.2, 160.2, 138.4, 133.2, 133.2, 131.8, 129.3, 128.3, 127.6, 126.8, 126.7, 125.9, 124.7, 122.5, 120.2, 118.5, 112.4, 80.4, 69.4$ . HRMS: calculated for  $\text{C}_{19}\text{H}_{14}\text{N}_2\text{O}_3$   $[\text{M}]^+$  318.1004; found 318.1007.

**(S)-2-([1,1'-Biphenyl]-4-yl)-2-(nitromethyl)indolin-3-one (3i):**

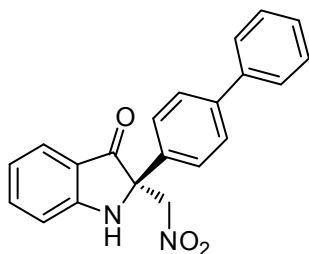

The product was obtained following the standard procedure using catalyst **4e** as yellow oil (37% yield) after FC (eluent 5/1; hexane/AcOEt). The *ee* was determined by HPLC using a Chiralpak IA column [hexane/*i*PrOH (90:10)]; flow rate 1.0 mL/min;  $\tau_{\text{minor}} = 34.9$  min,  $\tau_{\text{major}} = 52.3$  min (*e.r.* = 92:8).  $[\alpha]_{\text{D}}^{20} = -415.6$  ( $c = 0.14$  in  $\text{CH}_2\text{Cl}_2$ );  $^1\text{H-NMR}$  ( $\text{CDCl}_3$ ):  $\delta = 7.62$ -7.52 (m, 9H), 7.42 (t,  $J = 7.0$  Hz, 1H), 7.35 (d,  $J = 7.1$  Hz, 1H), 7.06 (d,  $J = 8.2$  Hz, 1H), 6.90 (t,  $J = 7.6$  Hz, 1H), 5.94 (s, 1H), 5.29 (d,  $J = 12.0$  Hz, 1H), 4.81 (d,  $J = 12.0$  Hz, 1H).  $^{13}\text{C-NMR}$  ( $\text{CDCl}_3$ ):  $\delta = 196.1, 160.1, 141.8, 140.1, 138.4, 133.3,$

128.8, 127.9, 127.7, 127.1, 125.9, 125.6, 120.3, 118.4, 112.3, 80.3, 69.2. HRMS: calculated for  $C_{21}H_{16}N_2O_3$   $[M]^+$  344.1161; found 344.1154.

**(S)-tert-Butyl 2-(nitromethyl)-3-oxo-2,3'-biindoline-1'-carboxylate (3j):**

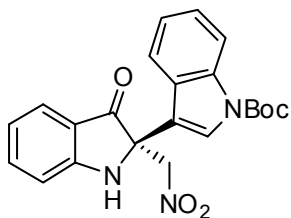

The product was obtained following the standard procedure using catalyst **4e** as yellow oil (52% yield) after FC (eluent 5/1; hexane/AcOEt). The *ee* was determined by HPLC using a Chiralpak IC column [hexane/*i*PrOH (90:10)]; flow rate 1.0 mL/min;  $\tau_{\text{major}} = 19.5$  min,  $\tau_{\text{minor}} = 21.5$  min (*e.r.* = 80:20).  $[\alpha]_D^{20} = -49.3$  ( $c = 0.75$  in  $CH_2Cl_2$ );  $^1H$ -NMR ( $CDCl_3$ ):  $\delta = 8.09$  (d,  $J = 8.3$  Hz, 1H), 7.64-7.58 (m, 3H), 7.50 (t,  $J = 8.3$  Hz, 1H), 7.26 (t,  $J = 8.3$  Hz, 1H), 7.15 (d,  $J = 7.2$  Hz, 1H), 6.94 (d,  $J = 8.2$  Hz, 1H), 6.88 (t,  $J = 7.8$  Hz, 1H), 5.62 (sb, 1H), 5.26 (d,  $J = 13.2$  Hz, 1H), 4.86 (d,  $J = 13.2$  Hz, 1H), 1.58 (s, 9H).  $^{13}C$ -NMR ( $CDCl_3$ ):  $\delta = 194.6, 160.1, 138.3, 135.9, 126.9, 125.7, 125.1, 124.4, 123.2, 120.6, 119.9, 119.6, 115.9, 114.4, 112.9, 84.6, 79.2, 77.2, 66.6, 28.1$ . HRMS: calculated for  $C_{22}H_{21}N_3O_5$   $[M]^+$  407.1481; found 407.1481.

**(S)-2-[(S/R)-1-Nitroethyl]-2-phenylindolin-3-one (3k/3k'):**

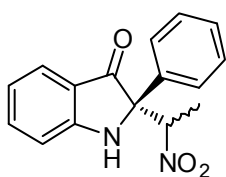

These products were obtained as a mixture of diastereoisomers (*dr*=3:1) following the standard procedure using catalyst **4e**. *Major diastereoisomer*: it was isolated as a yellow oil in 73% yield after FC (eluent 6/1; hexane/AcOEt). the *ee* was determined by HPLC using a Chiralpak IA column [hexane/*i*PrOH (90:10)]; flow rate 1.0 mL/min;  $\tau_{\text{minor}} = 8.3$  min,  $\tau_{\text{major}} = 7.3$  min (*e.r.* = 91:9).  $[\alpha]_D^{20} = -276.5$  ( $c = 0.78$  in  $CH_2Cl_2$ );  $^1H$ -NMR ( $CDCl_3$ ):  $\delta = 7.54$ -7.21 (m, 7H), 7.02 (d,  $J = 8.3$  Hz, 1H), 6.78-6.73 (m, 1H), 6.00 (sb, 1H), 5.46 (q,  $J = 6.5$  Hz, 1H), 1.64 (d,  $J = 4.0$  Hz, 3H).  $^{13}C$ -NMR ( $CDCl_3$ ):  $\delta = 195.7, 160.4, 137.6, 134.6, 128.2, 127.9, 124.6, 124.4, 118.7, 117.5, 111.1, 87.4, 71.3, 14.1$ . *Minor diastereoisomer*: it was isolated as yellow oil in 24% yield after FC (eluent 6/1; hexane/AcOEt). The *ee* was determined by HPLC using a Chiralpak IA column [hexane/*i*PrOH (90:10)]; flow rate 1.0 mL/min;  $\tau_{\text{minor}} = 42.0$  min,  $\tau_{\text{major}} = 31.0$  min (*e.r.* = 89:11).  $[\alpha]_D^{20} = -168.8$  ( $c = 0.40$  in  $CH_2Cl_2$ );  $^1H$ -NMR ( $CDCl_3$ ):  $\delta = 7.49$ -1.17 (m, 7H), 7.0 (d,  $J = 8.1$  Hz, 1H), 6.95-6.78 (m, 1H), 5.43 (q,  $J = 6.1$  Hz, 1H), 5.26 (sb, 1H), 1.24 (d,  $J = 3.2$  Hz, 1H).  $^{13}C$ -NMR ( $CDCl_3$ ): 180.1, 144.2, 121.2, 118.3, 112.3, 111.8, 109.8, 109.1, 104.1, 103.3, 95.7, 69.6, 55.6, 12.3. HRMS: calculated for  $C_{16}H_{14}N_2O_3$   $[M]^+$  282.1000; found 282.1011

**(S)-2-(2-Nitropropan-2-yl)-2-phenylindolin-3-one (3l):**

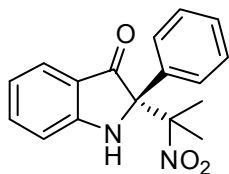

The product was obtained following the standard procedure using catalyst **4e** as yellow oil (87% yield) after FC (eluent 6/1; hexane/AcOEt). The *ee* was determined by HPLC using a Chiralpak IA column [hexane/*i*PrOH (90:10)]; flow rate 1.0 mL/min;  $\tau_{\text{minor}} = 11.8$  min,  $\tau_{\text{major}} = 9.8$  min (*e.r.* = 56:44).  $^1\text{H-NMR}$  ( $\text{CDCl}_3$ ):  $\delta = 7.62$ - $7.18$  (m, 7H),  $6.88$  (d,  $J = 8.7$  Hz, 1H),  $6.76$ - $6.71$  (m, 1H),  $2.01$  (s, 6H).  $^{13}\text{C-NMR}$  ( $\text{CDCl}_3$ ):  $\delta = 196.8, 159.5, 137.8, 133.6, 128.7, 128.1, 127.4, 125.1, 120.6, 119.4, 111.8, 94.2, 71.8, 22.8, 21.0$ . HRMS: calculated for  $\text{C}_{17}\text{H}_{16}\text{N}_2\text{O}_3$   $[\text{M}]^+$  296.1161; found 296.1246.

## Spectra of compounds 1j and 3a-l

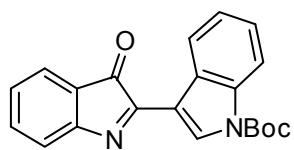

**1j**

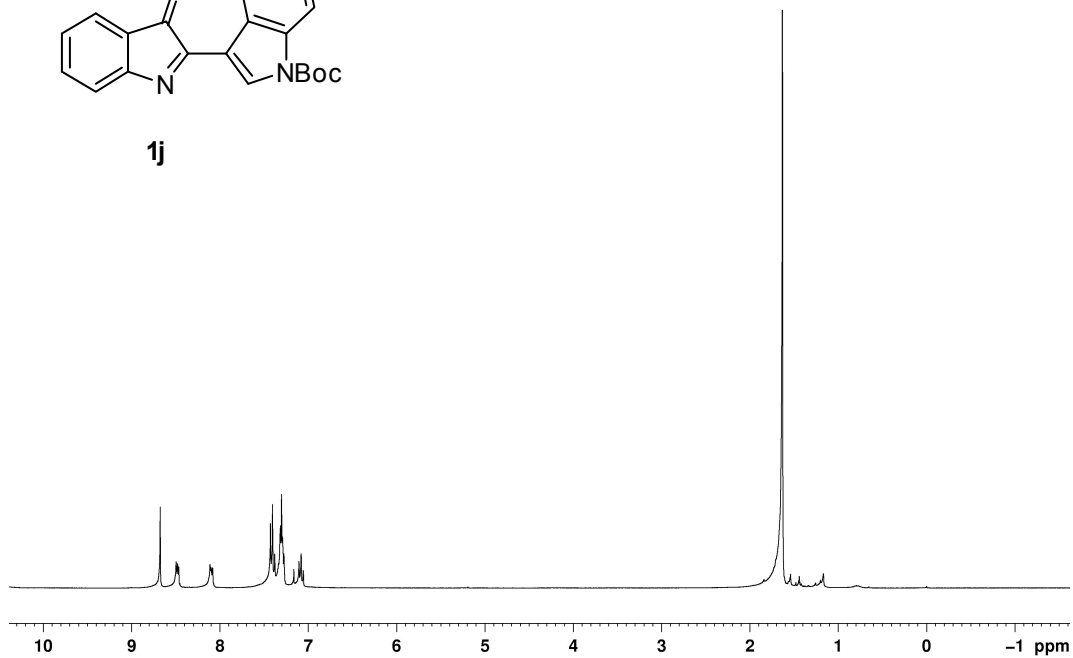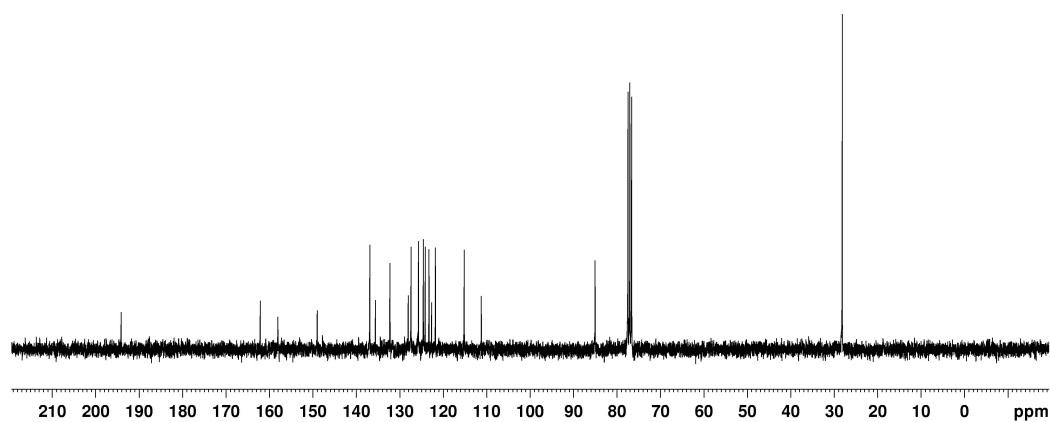



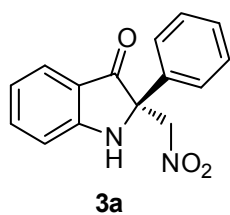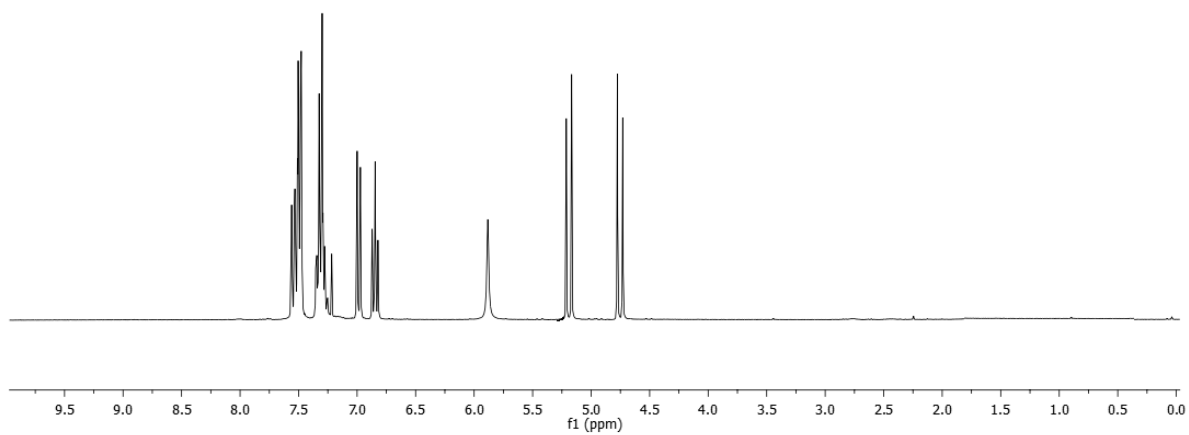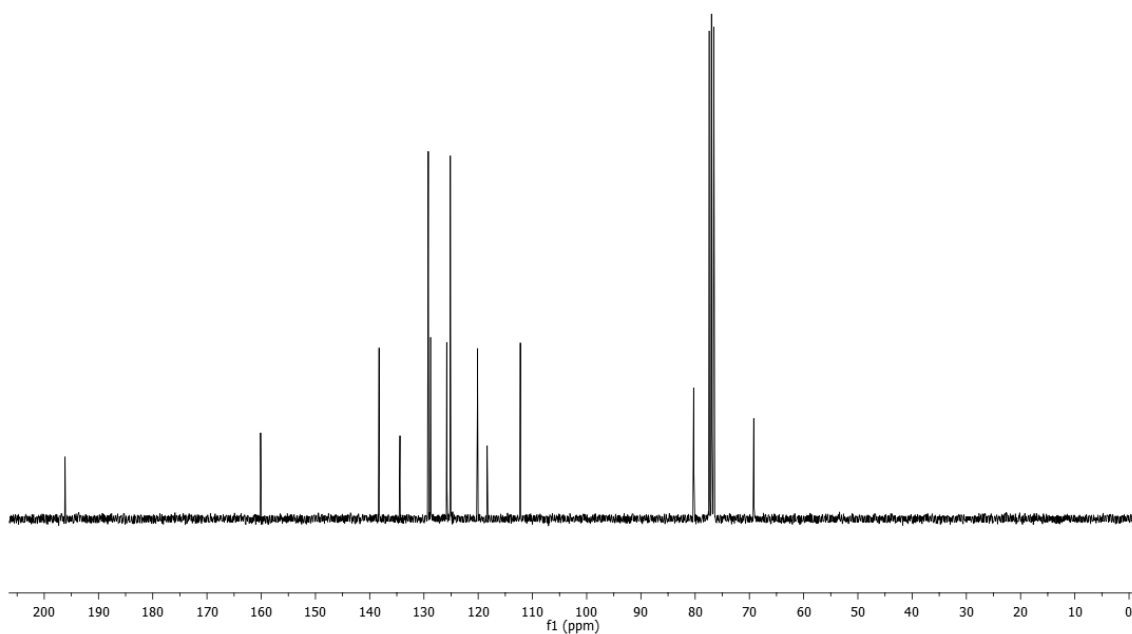

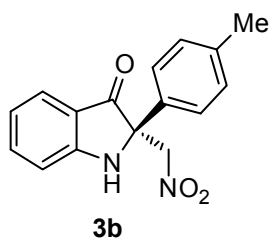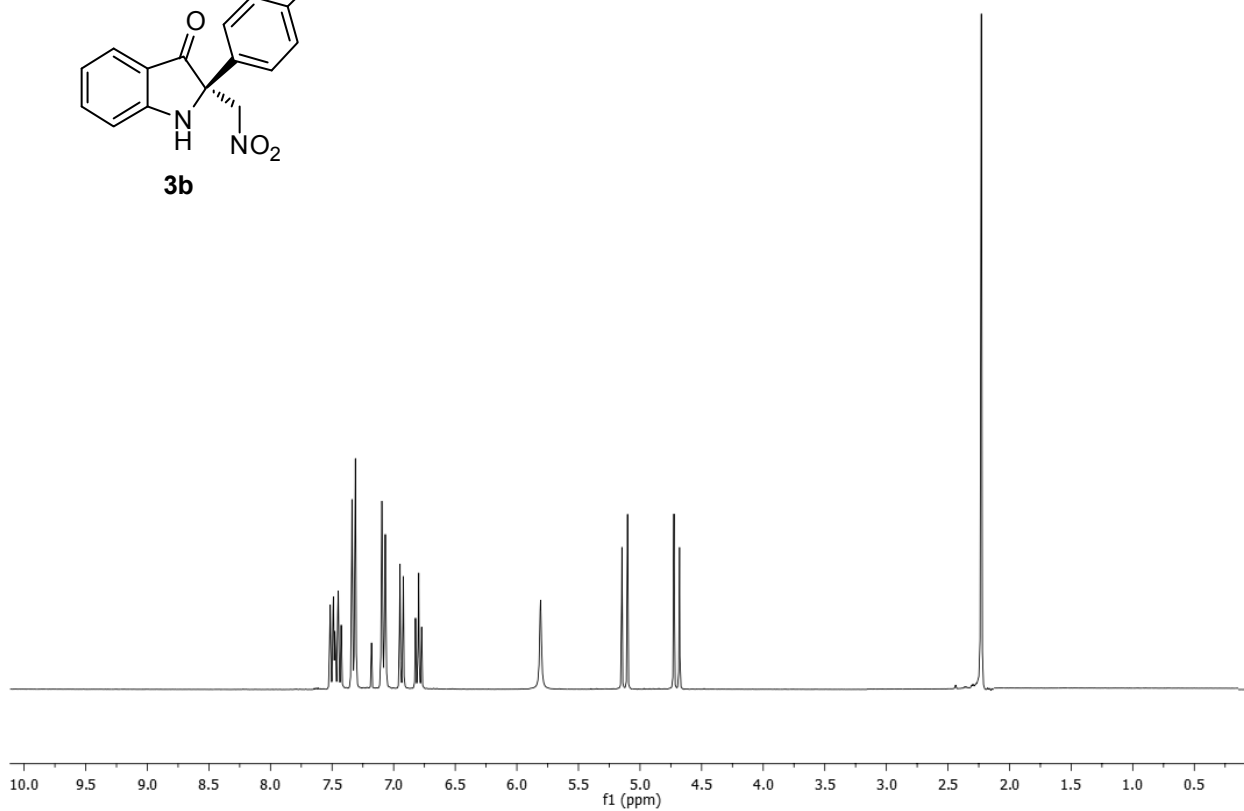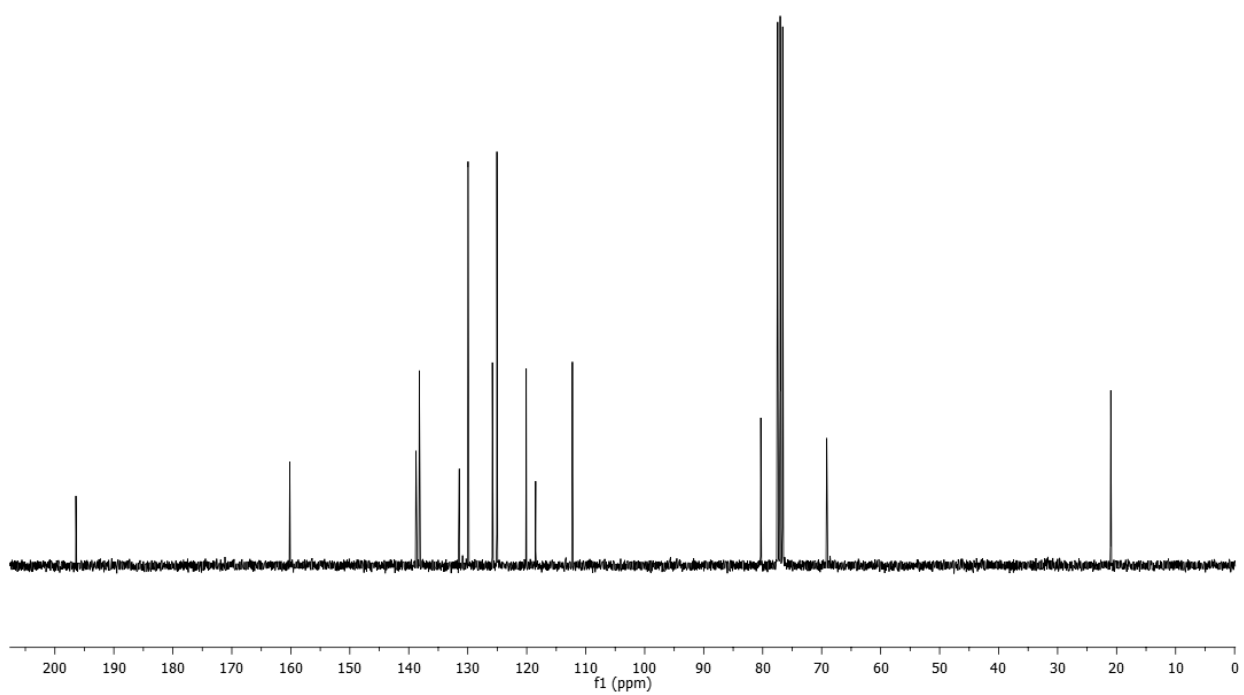

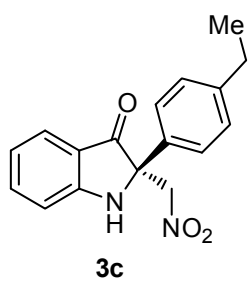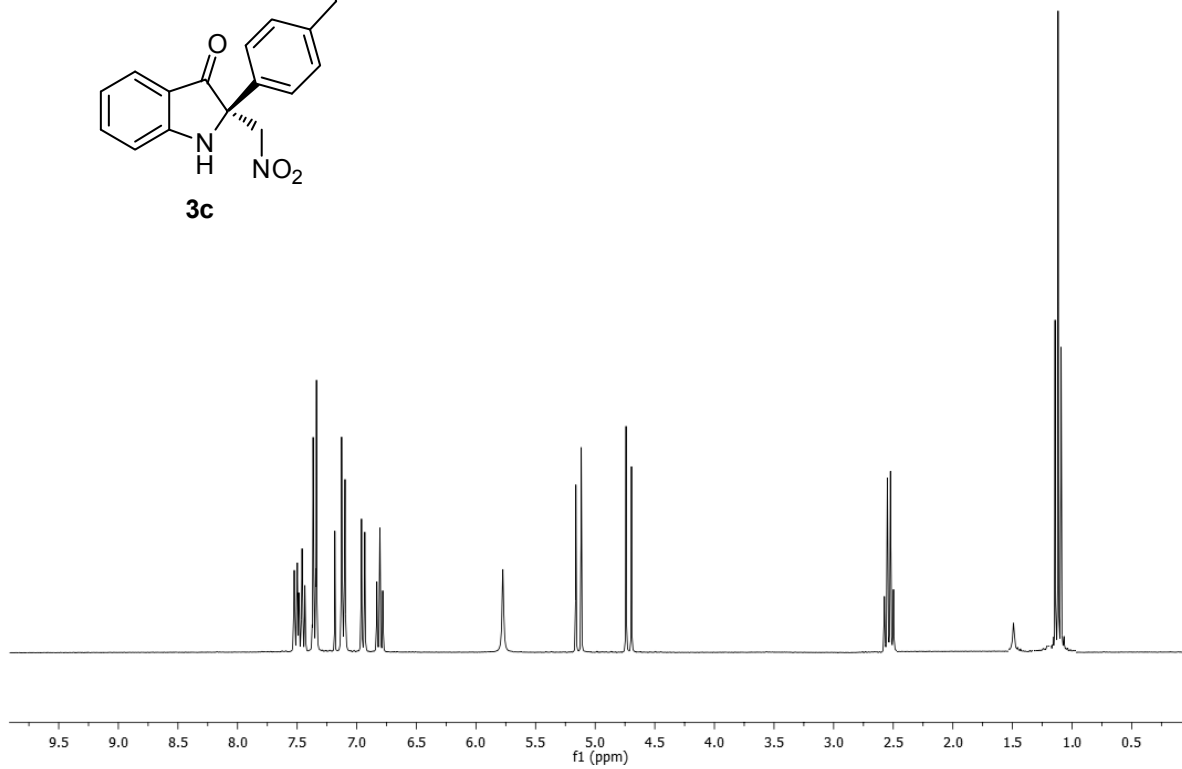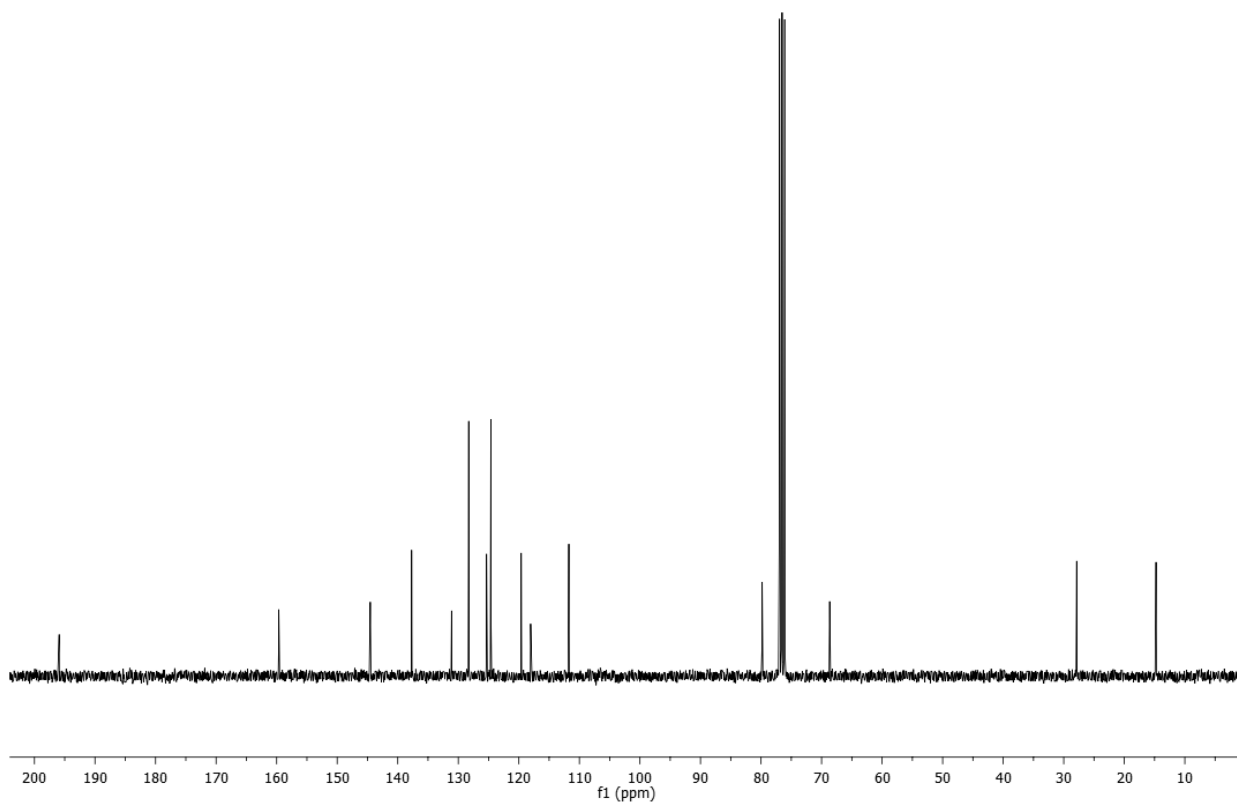

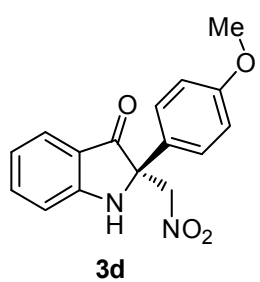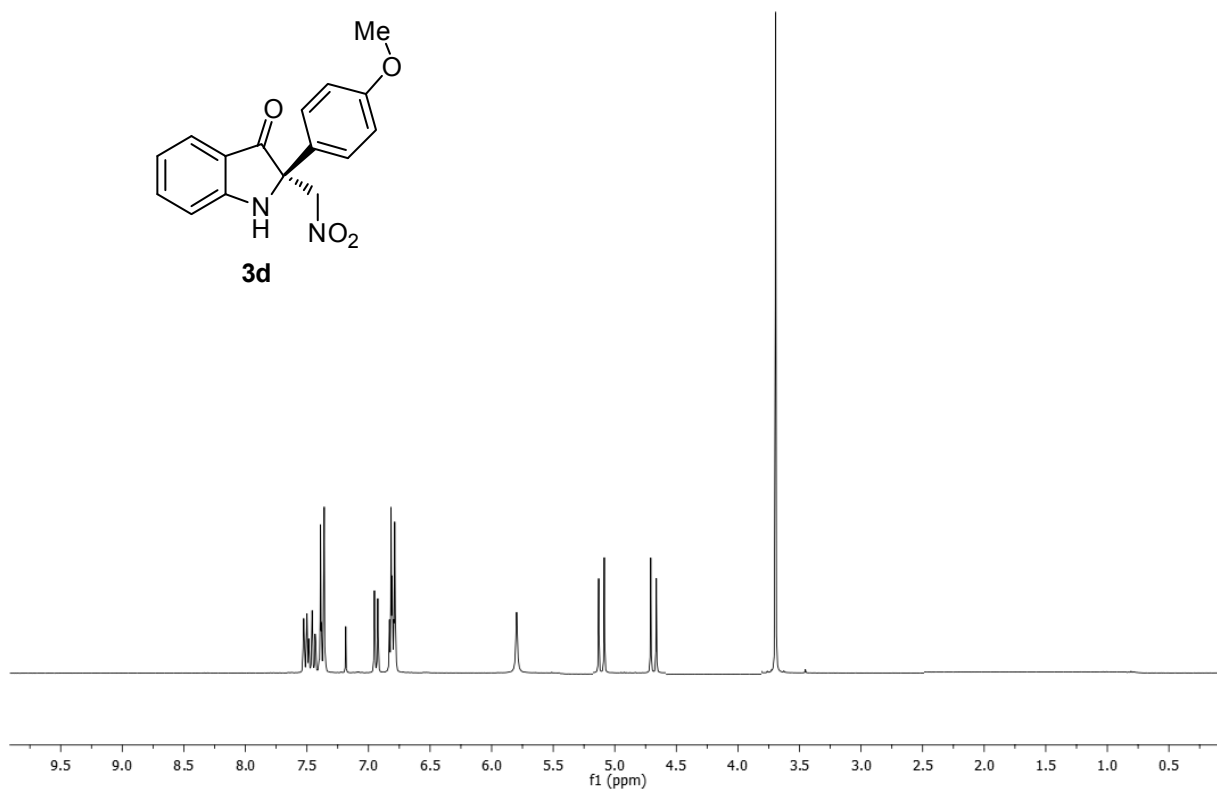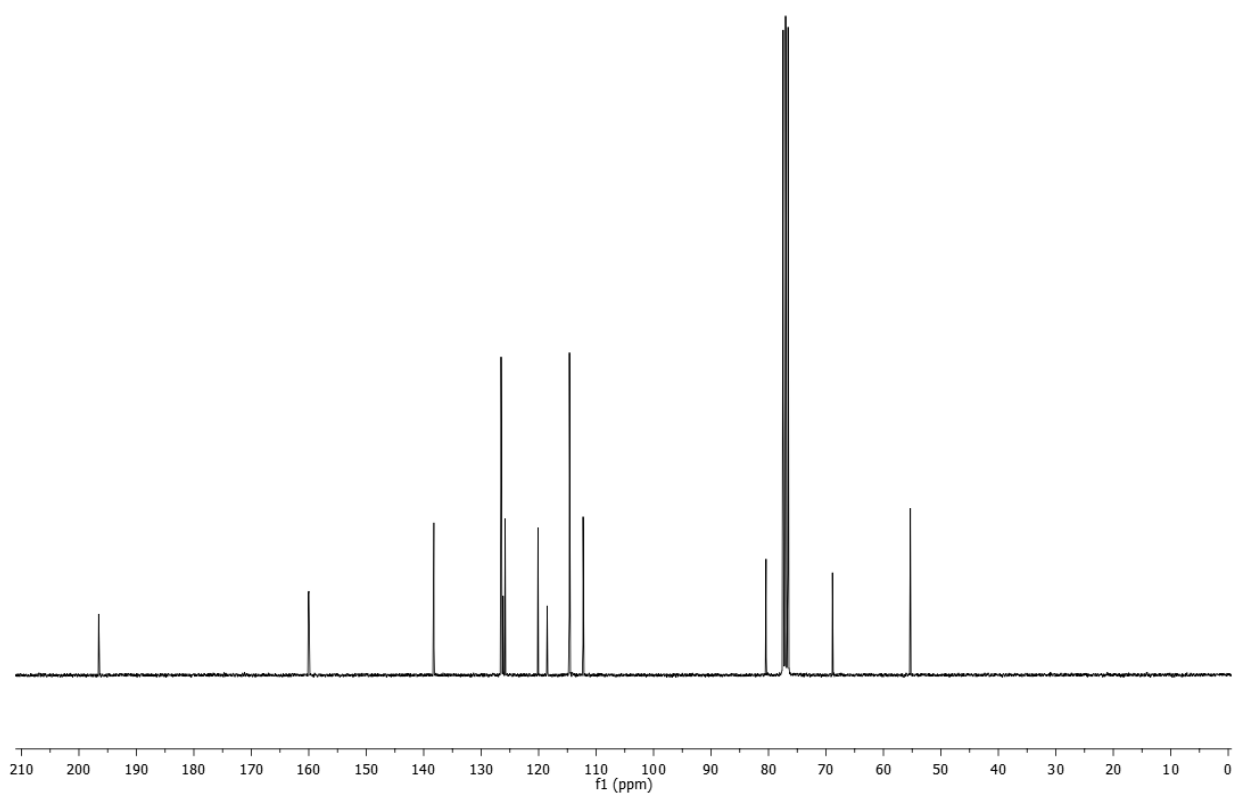

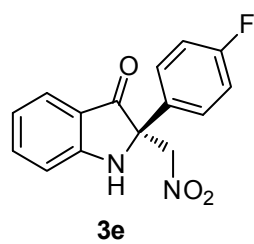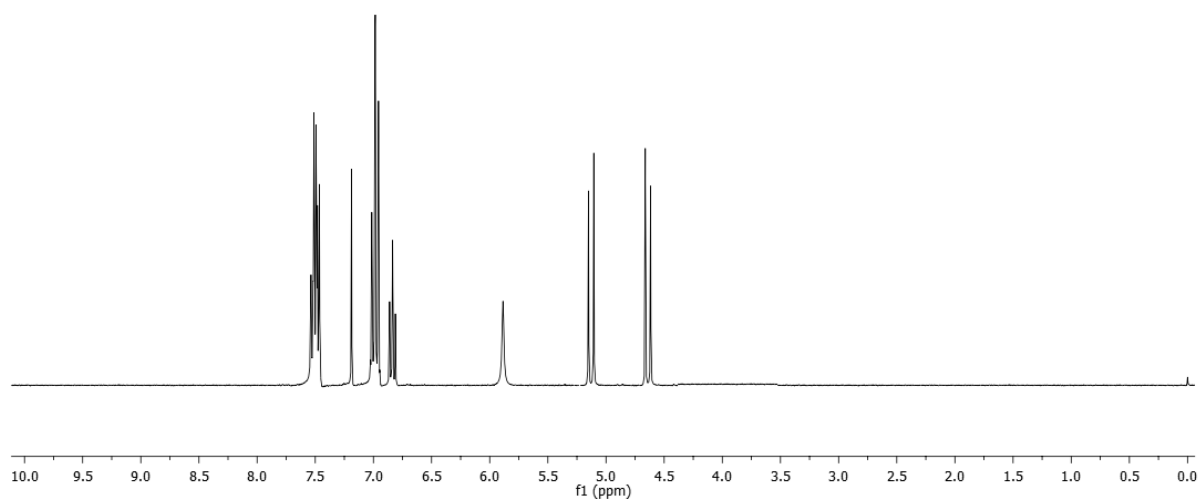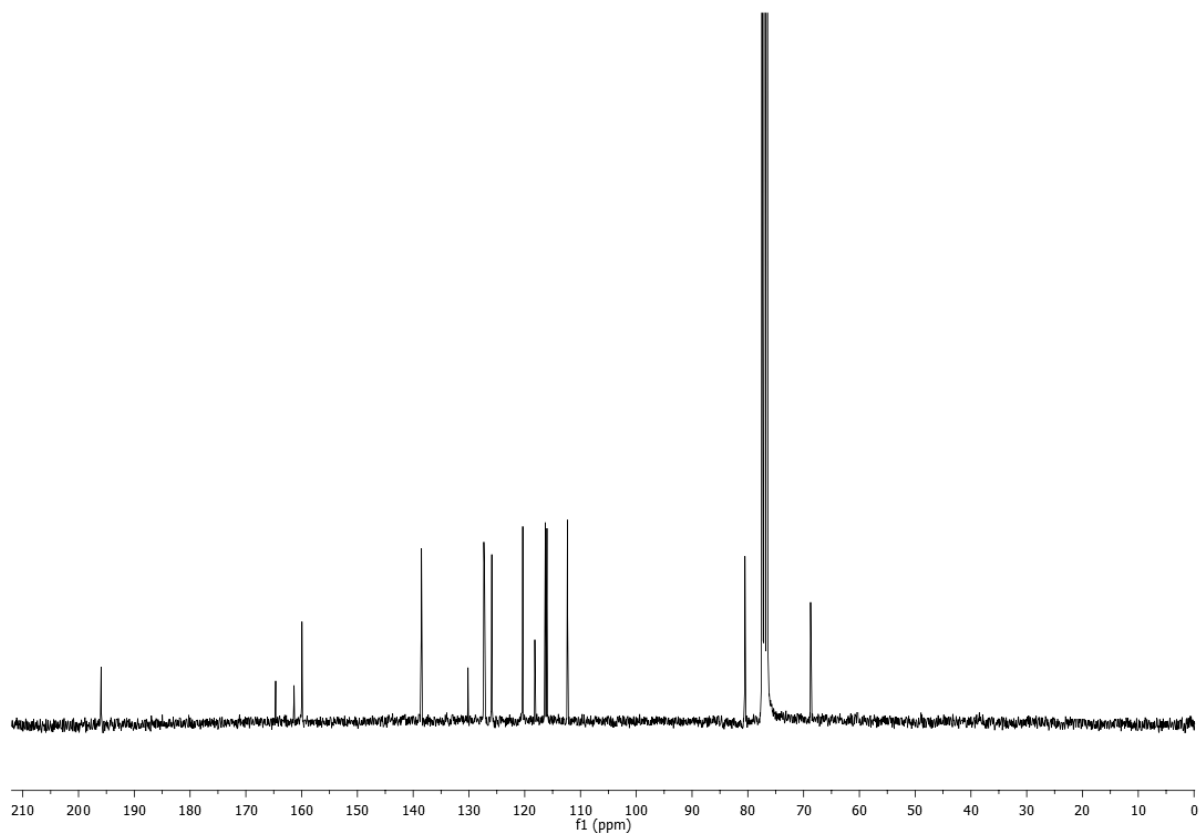

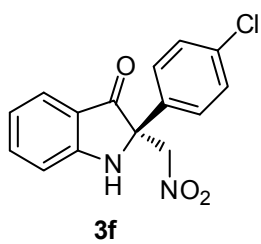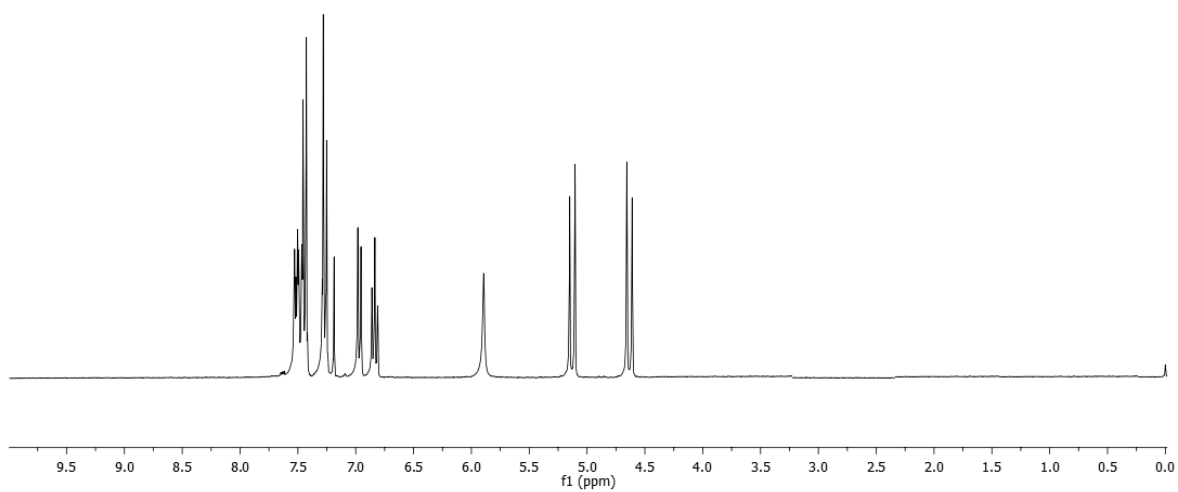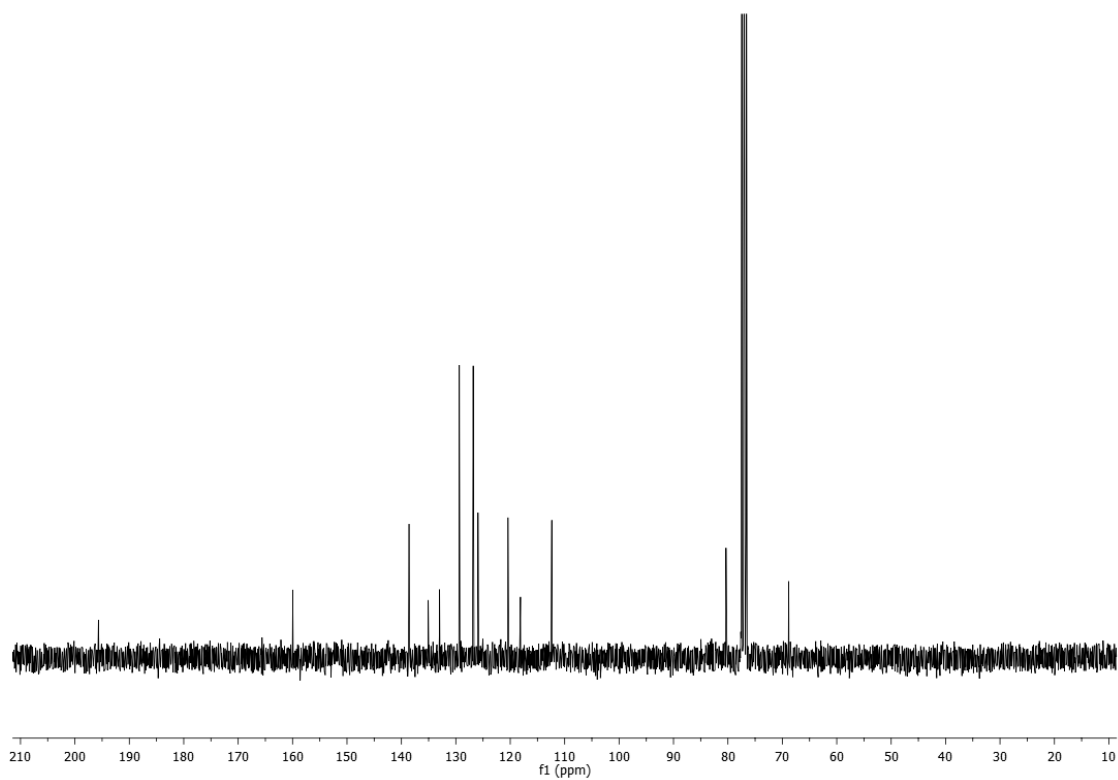

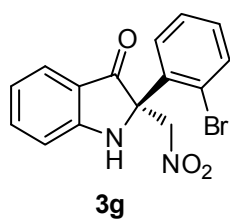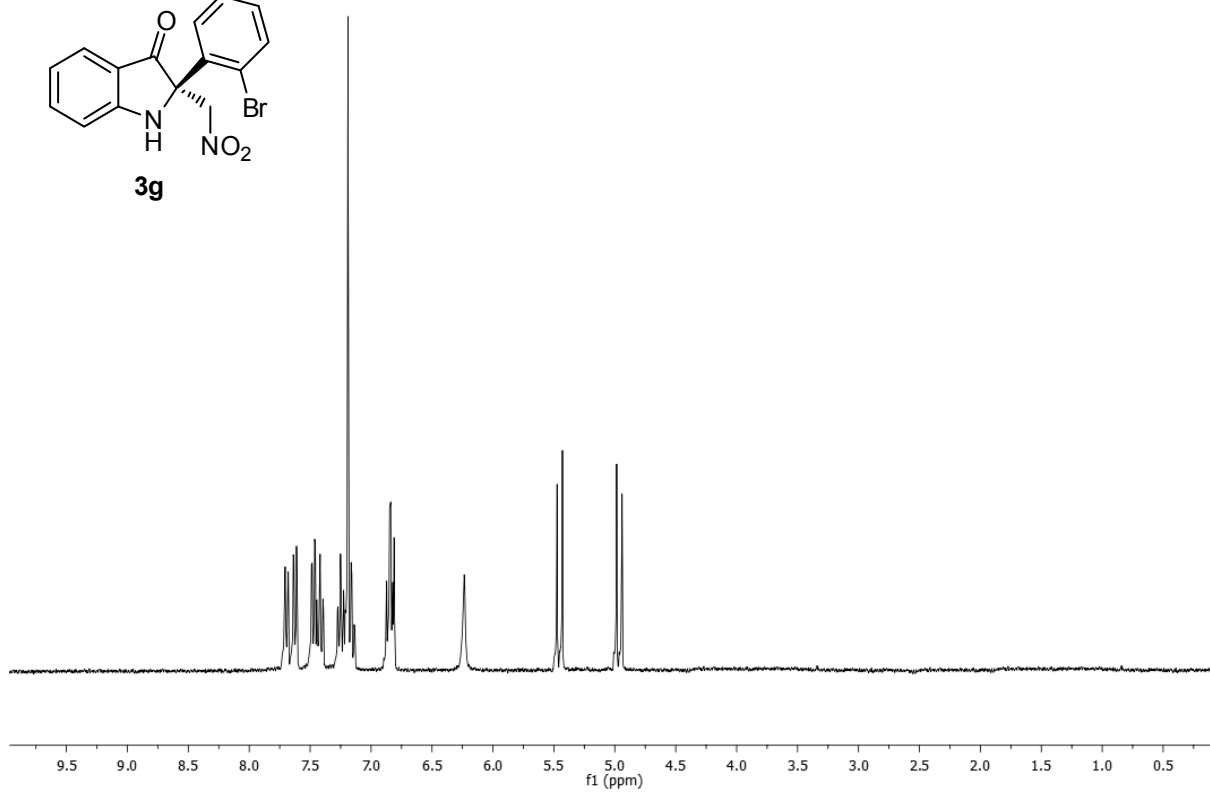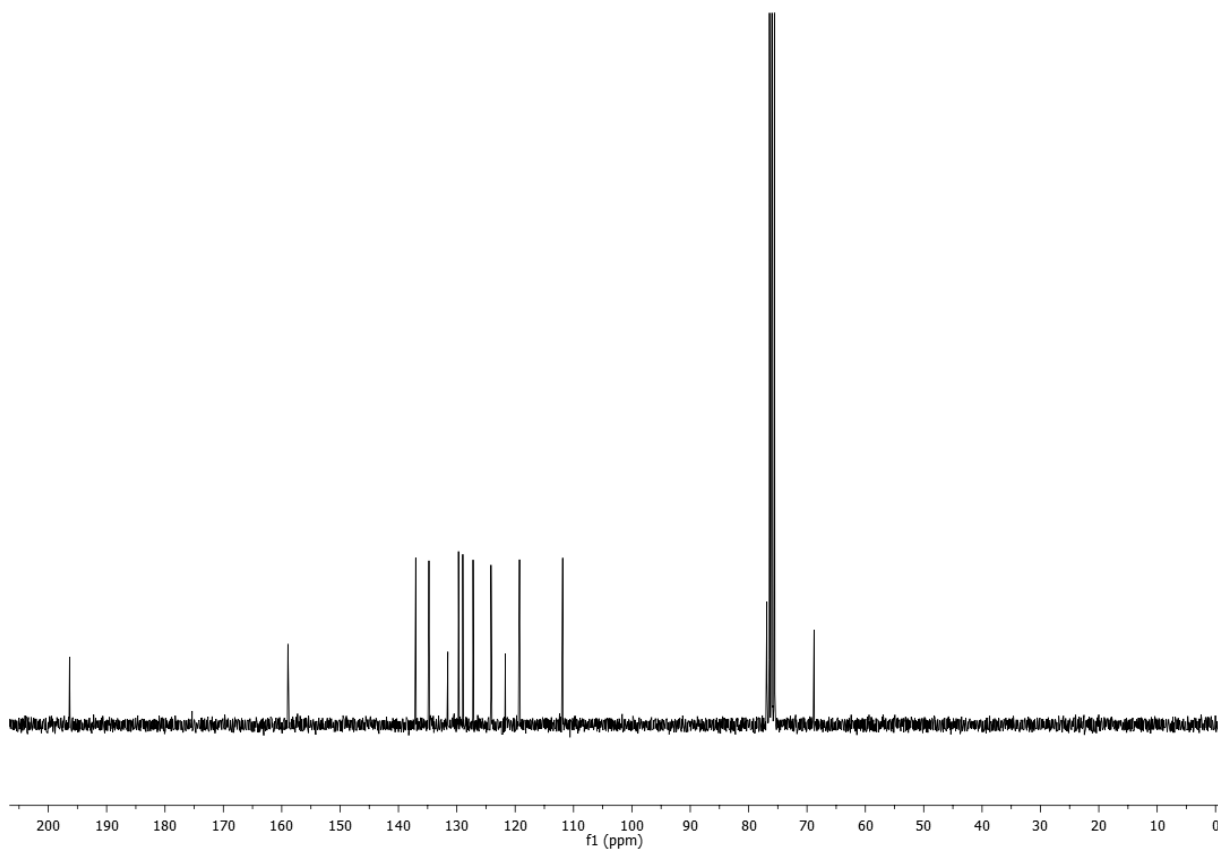

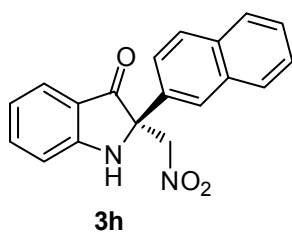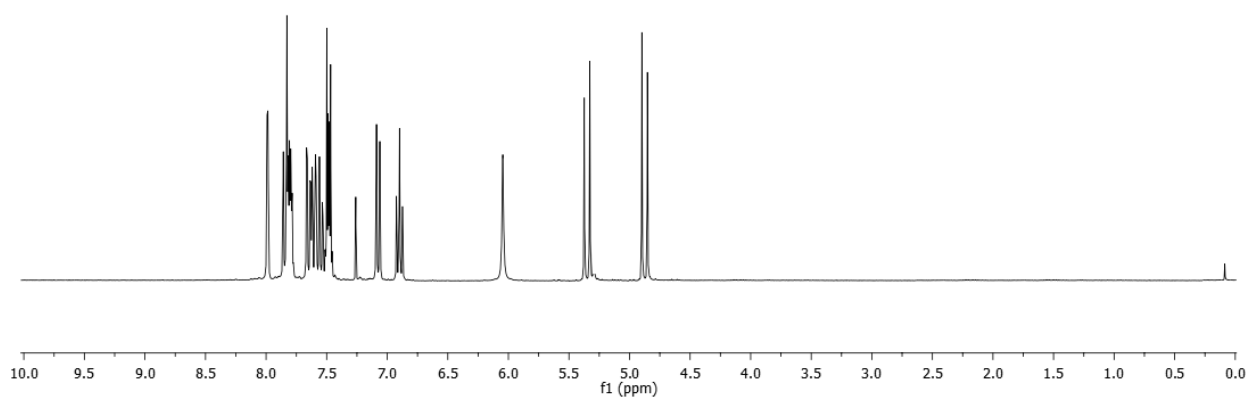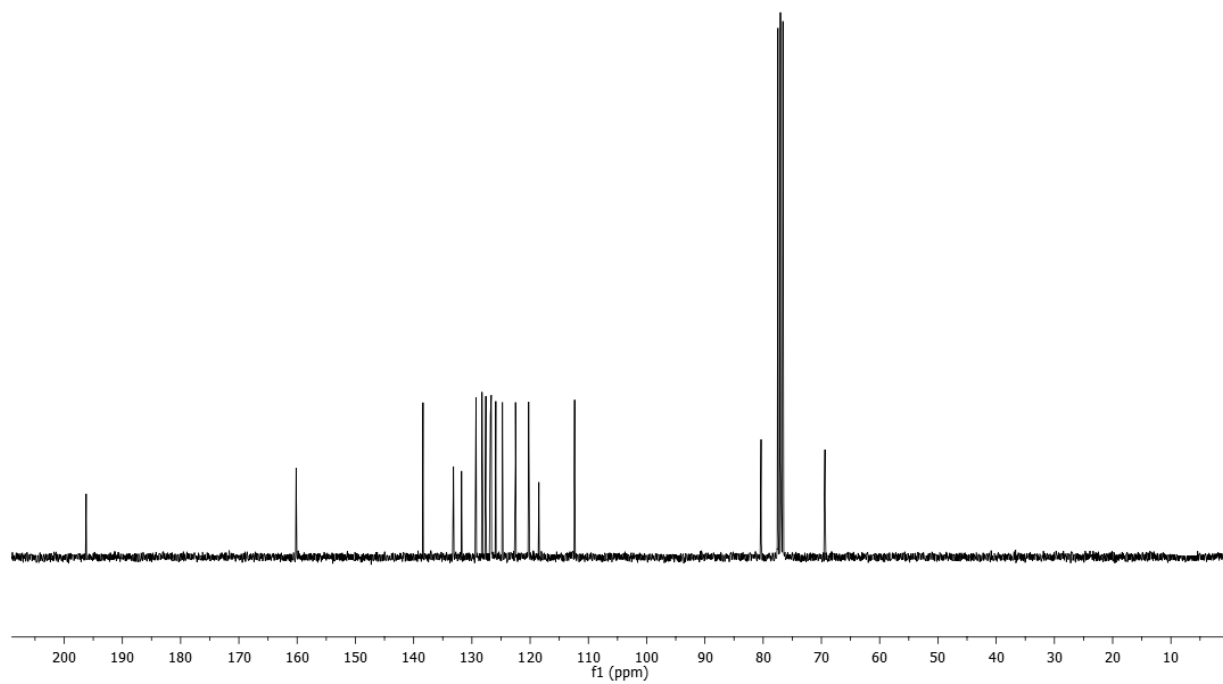



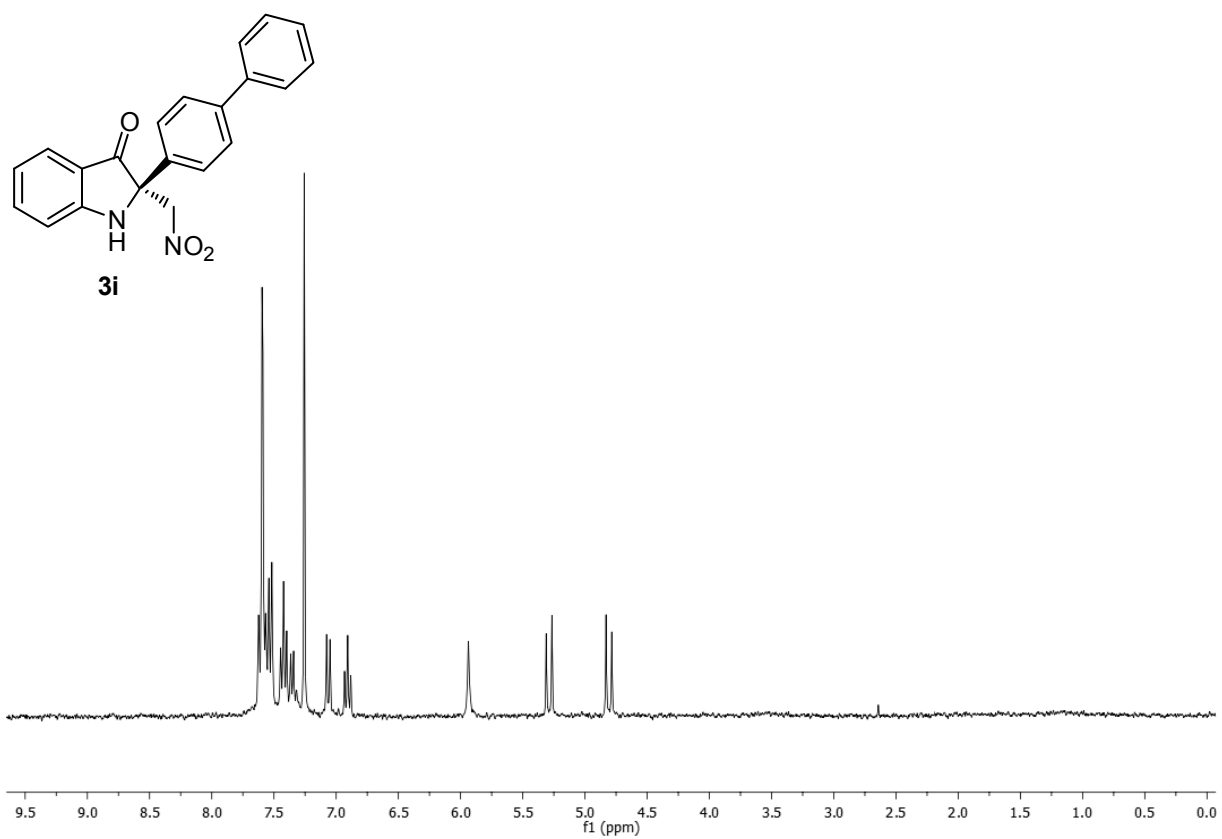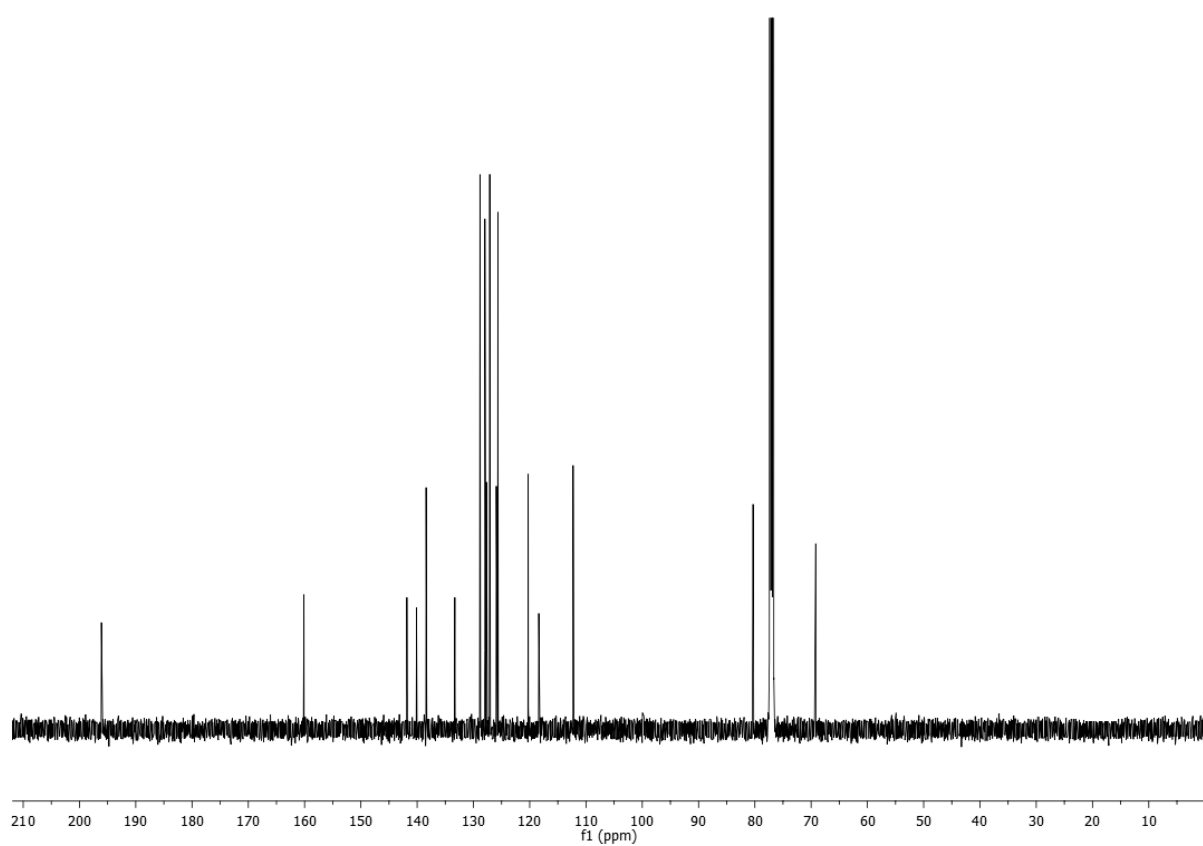

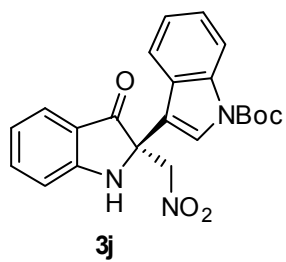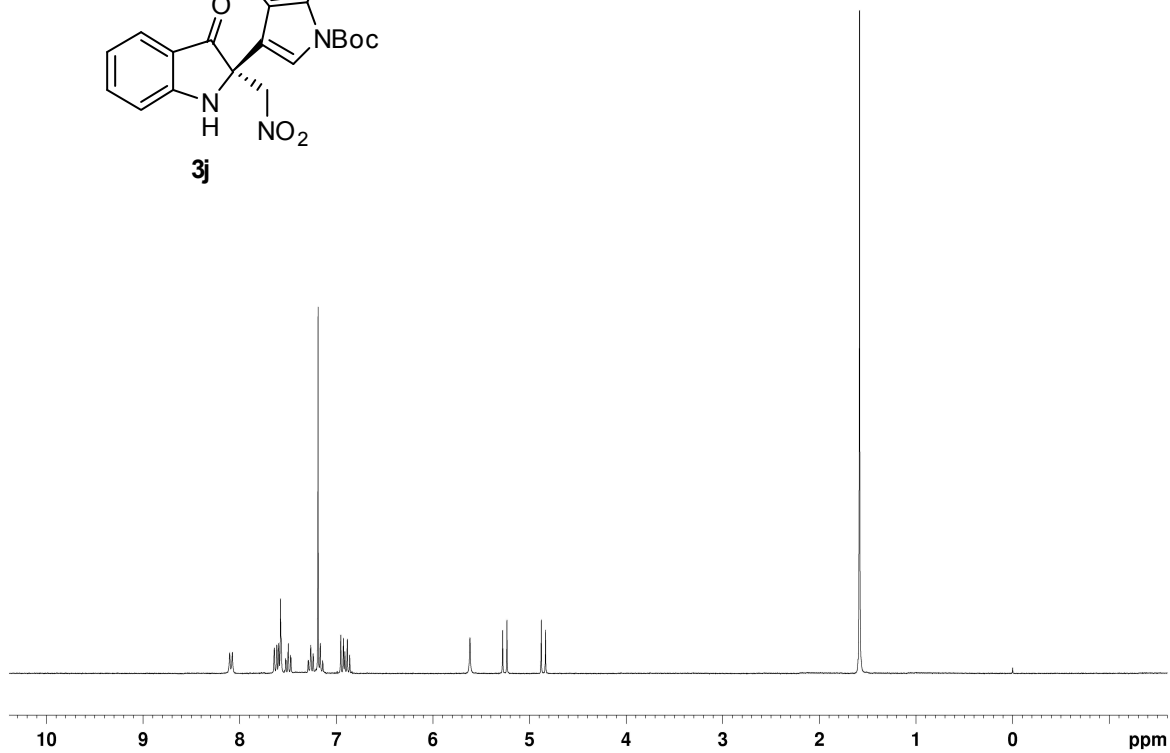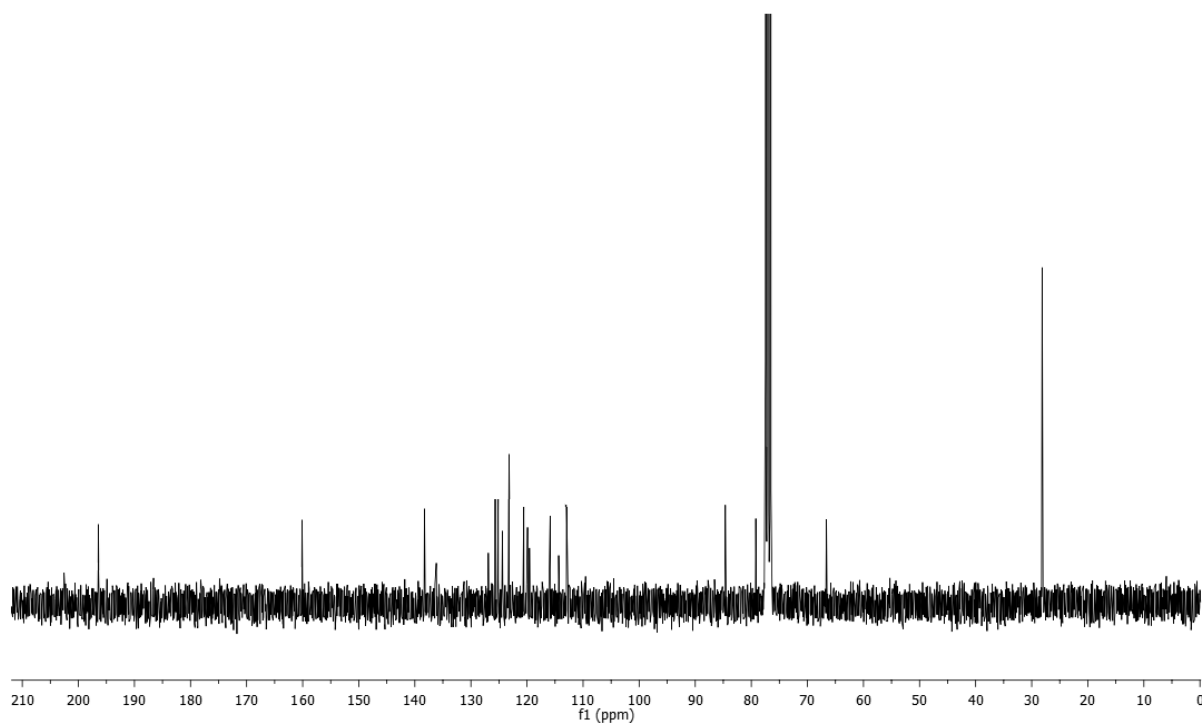

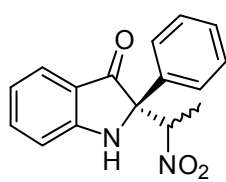

**3k**

Major diastereoisomer

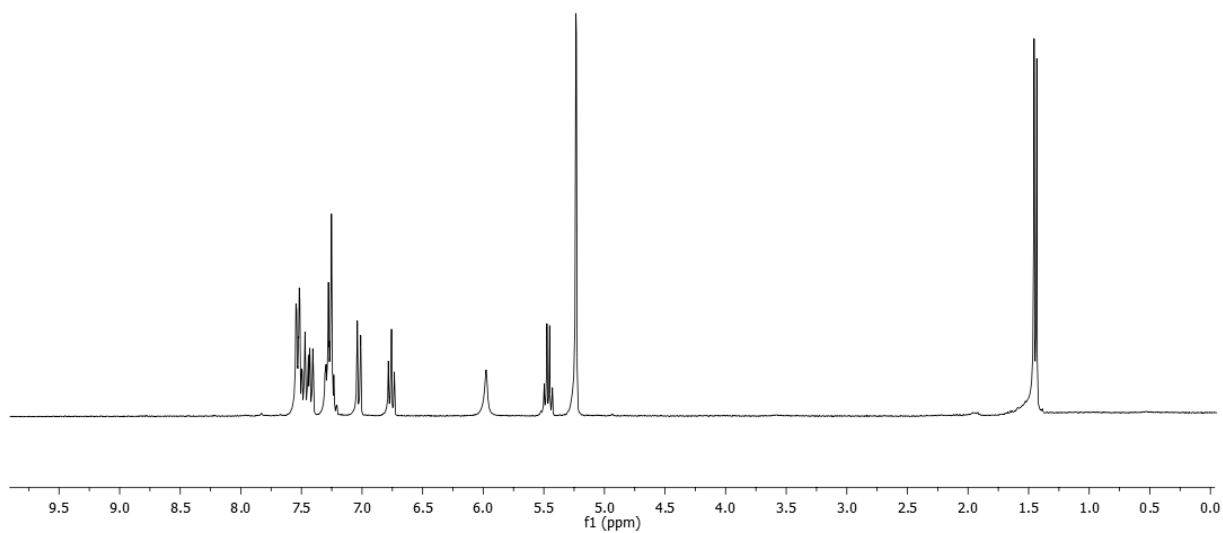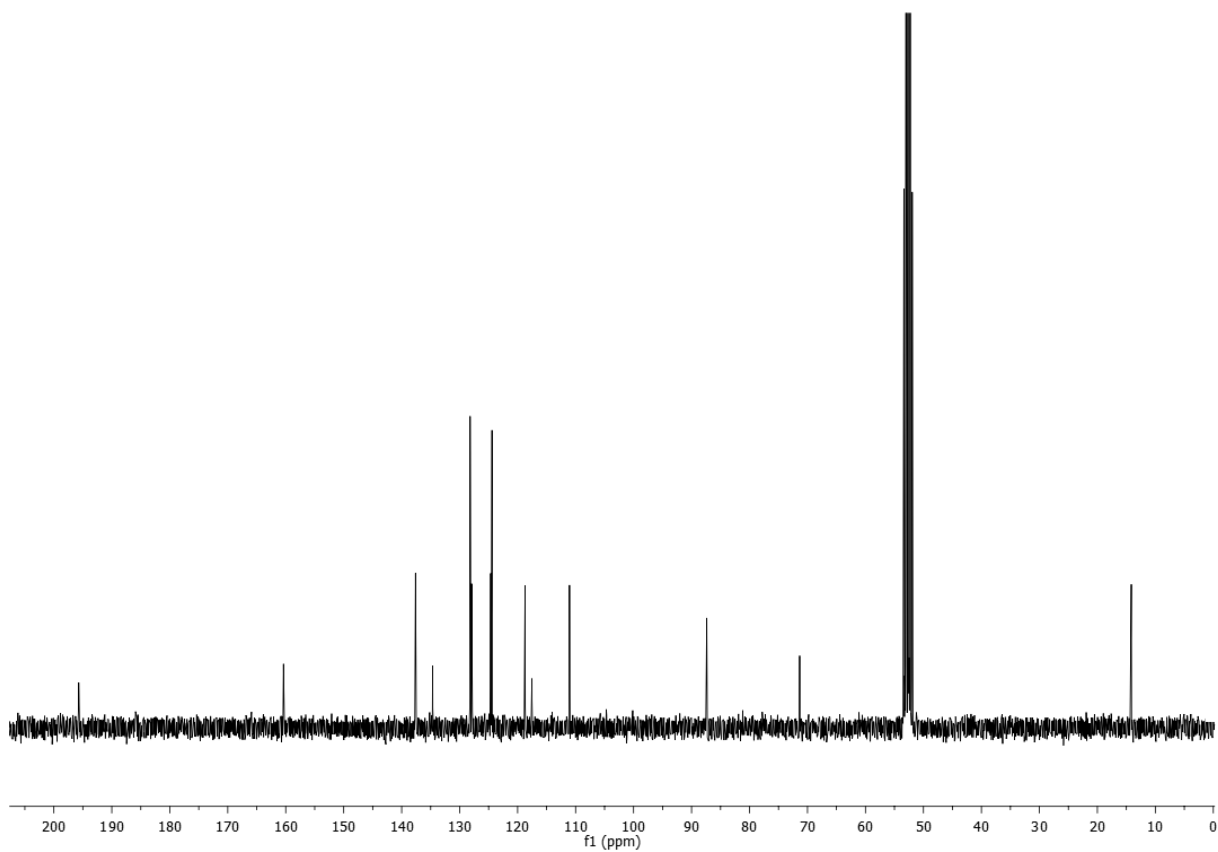

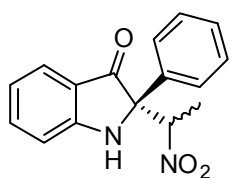

**3k'**

Minor diastereoisomer

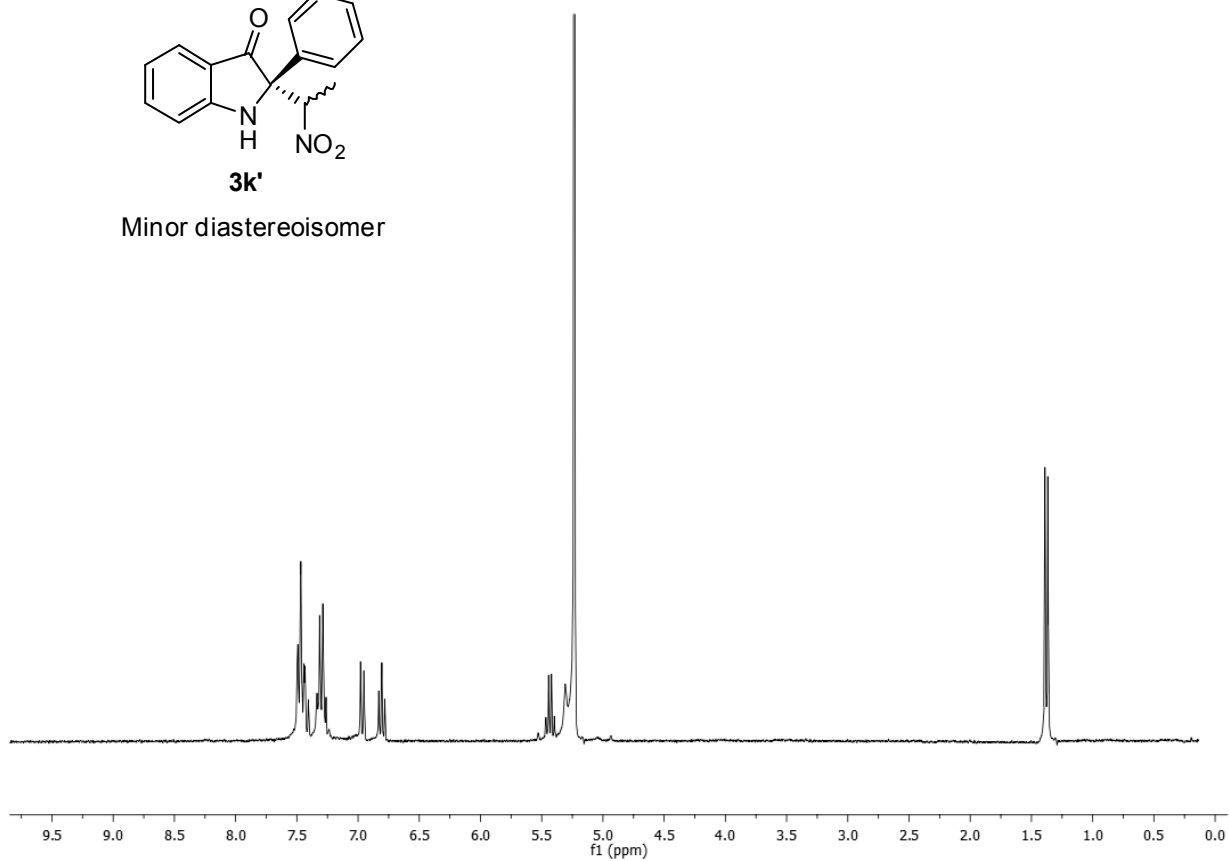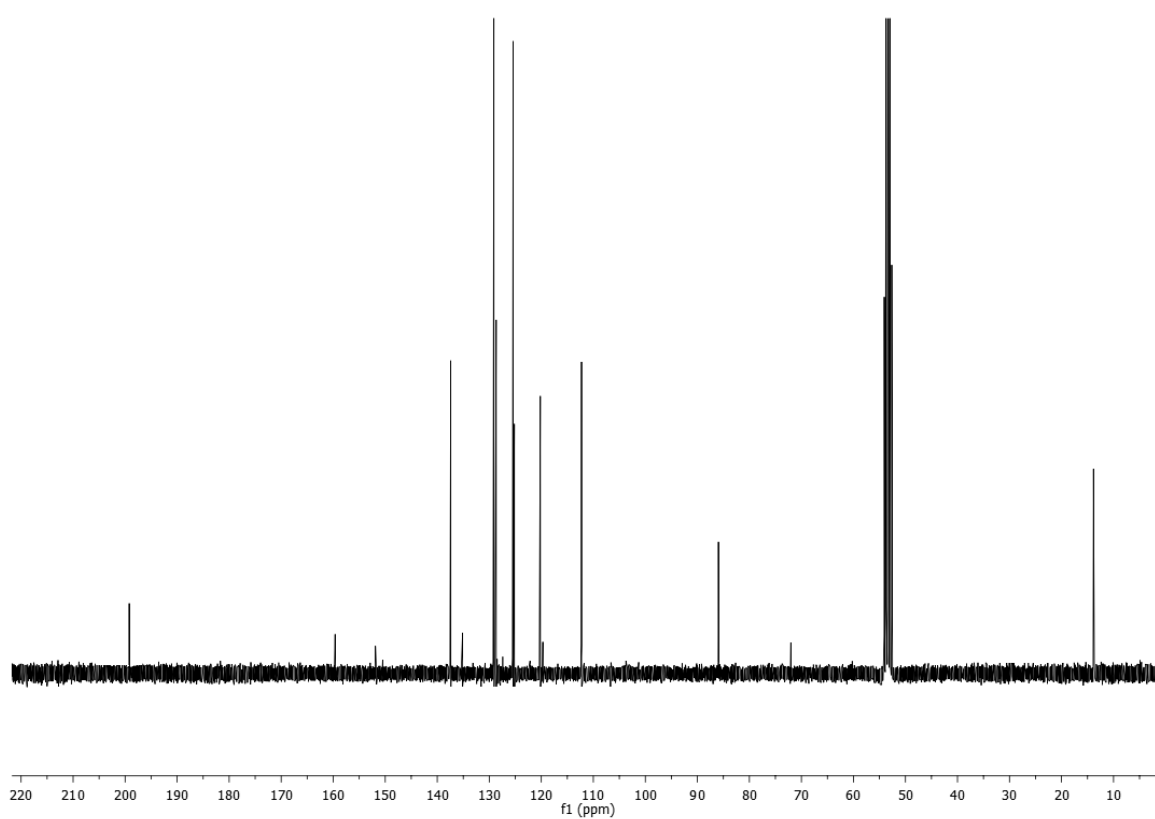

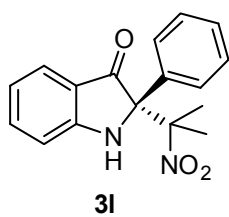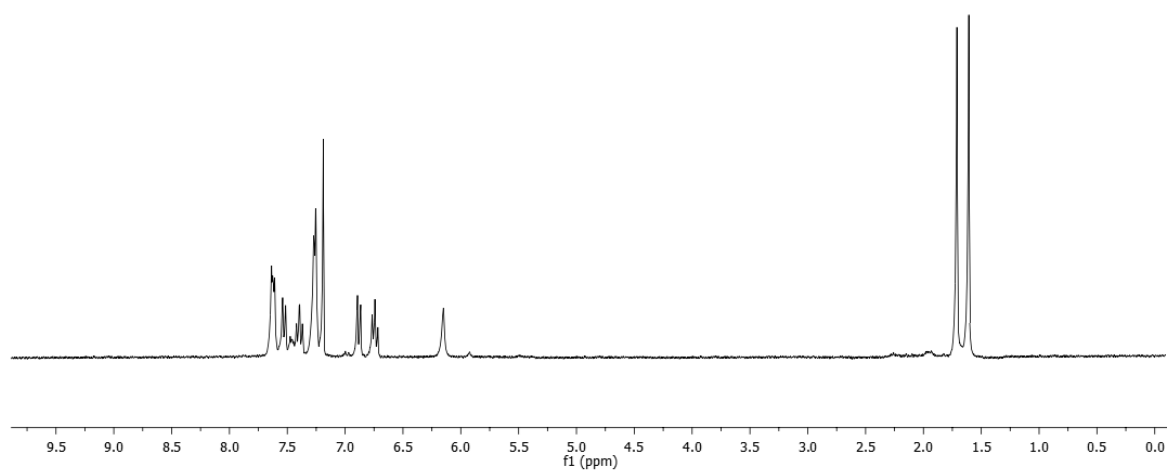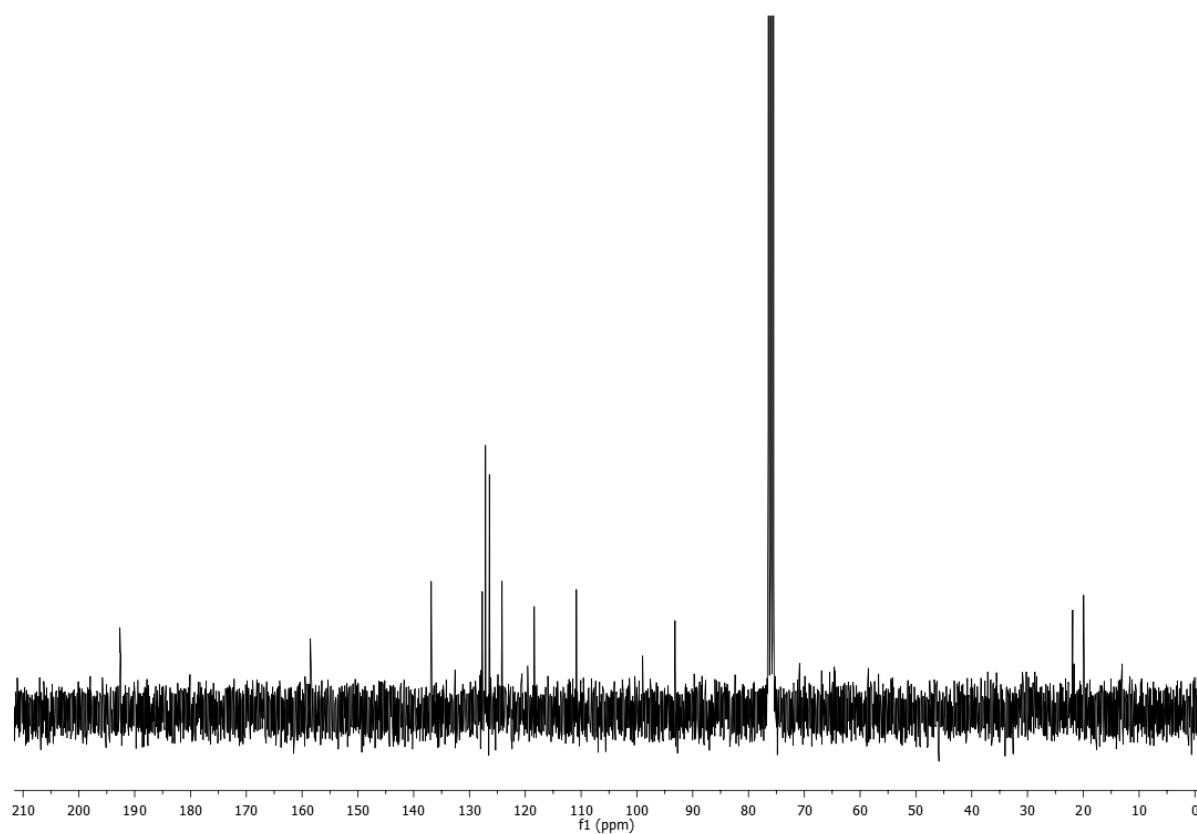

## HPLC chromatograms of compound 3a-k

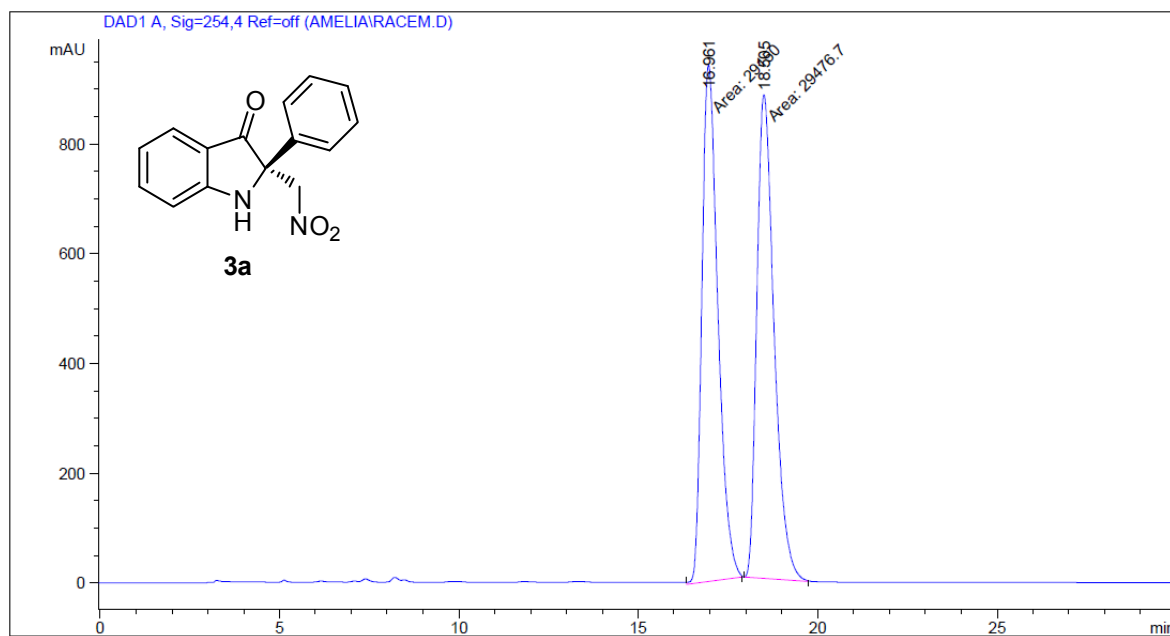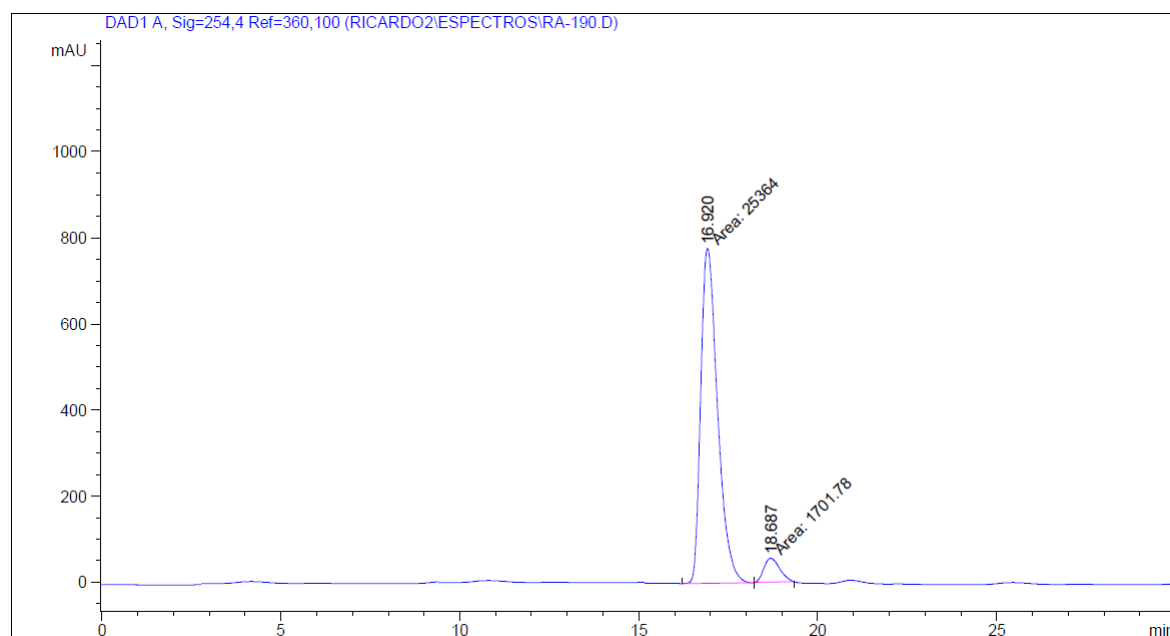

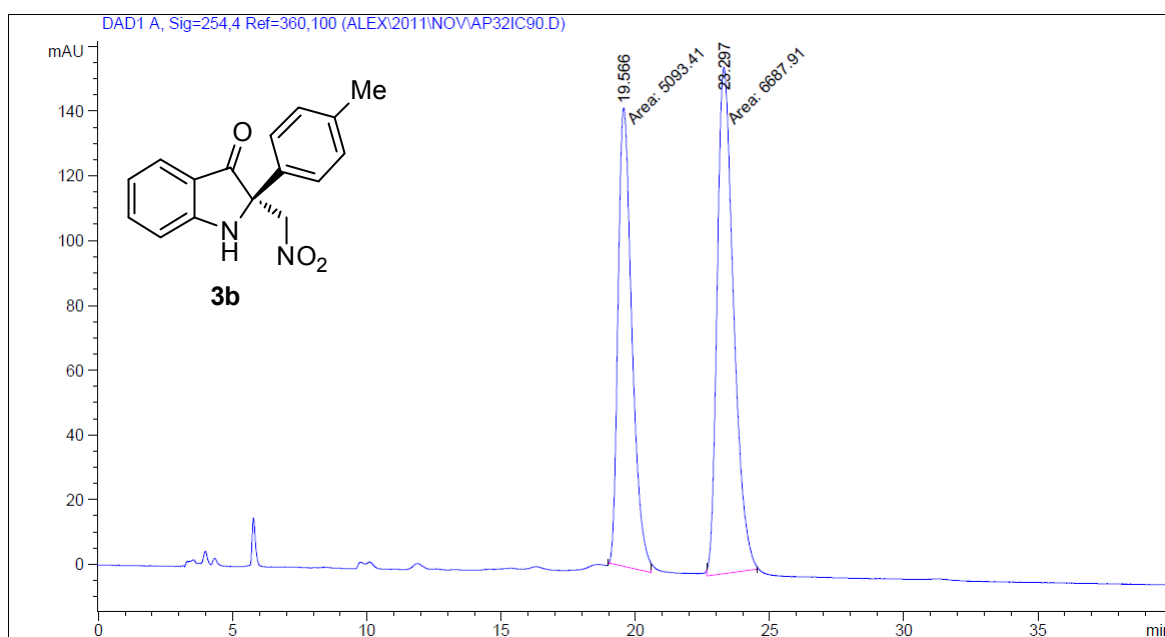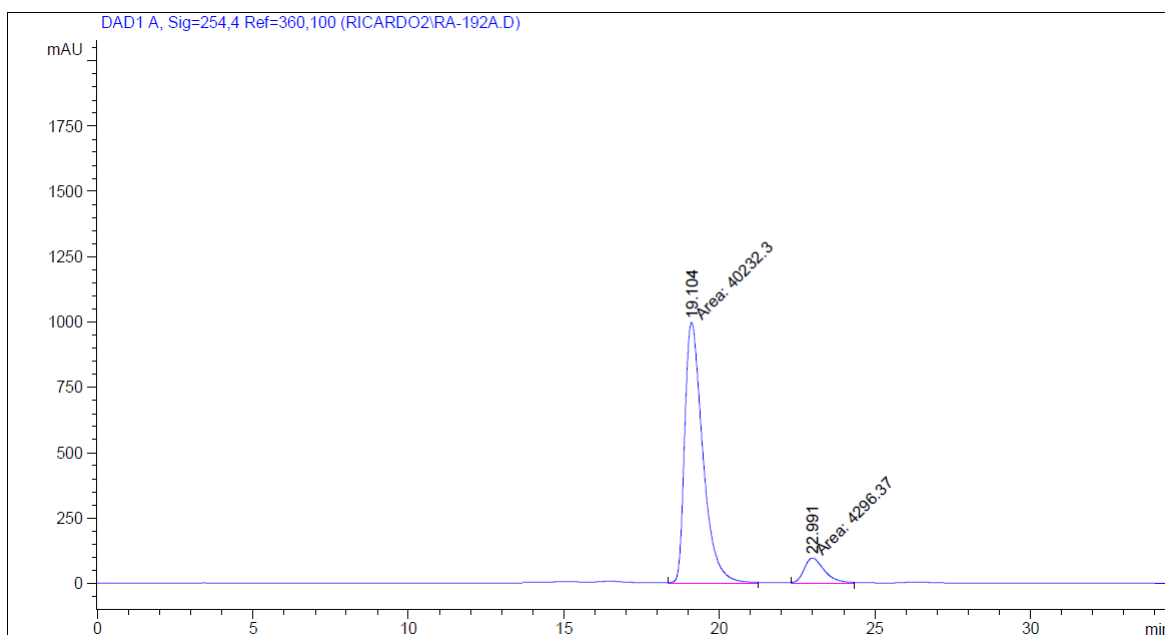

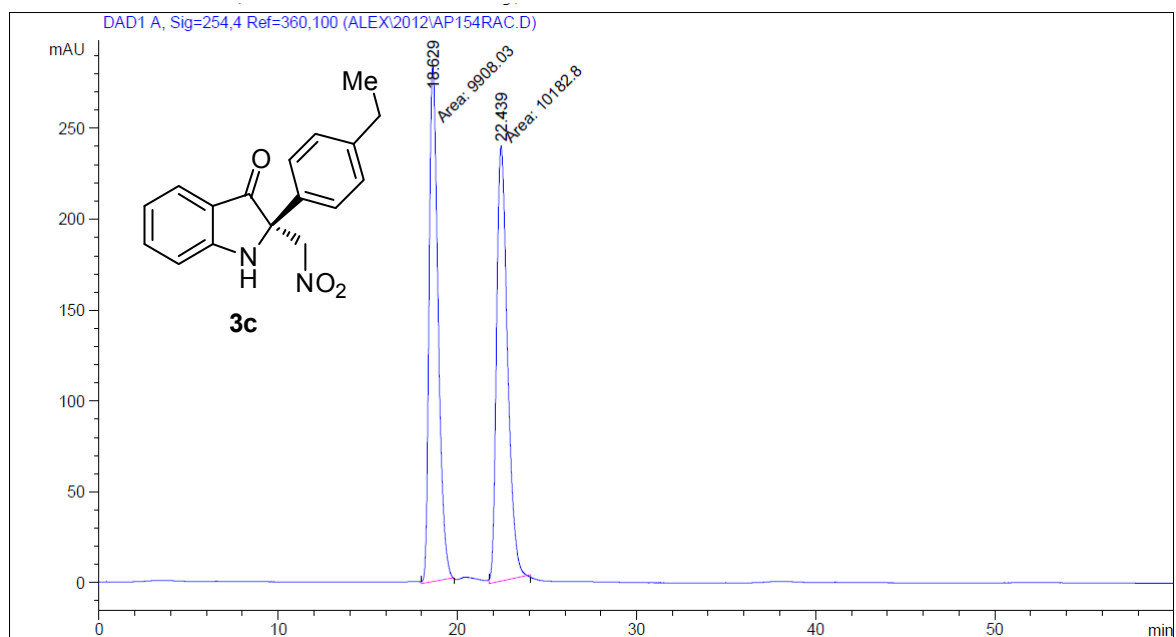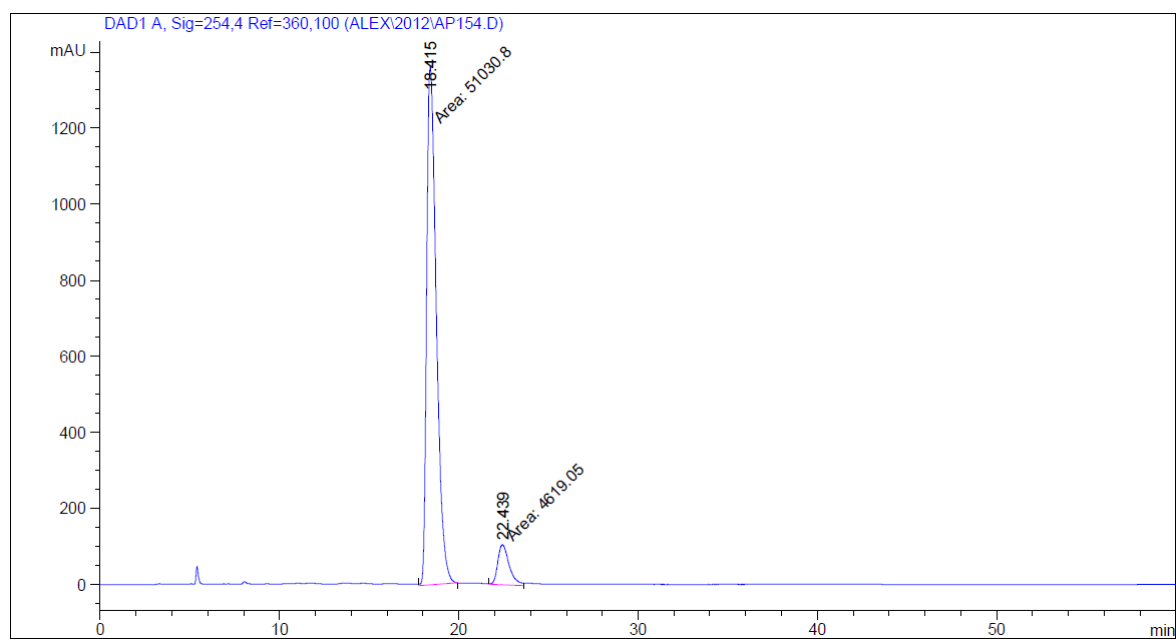



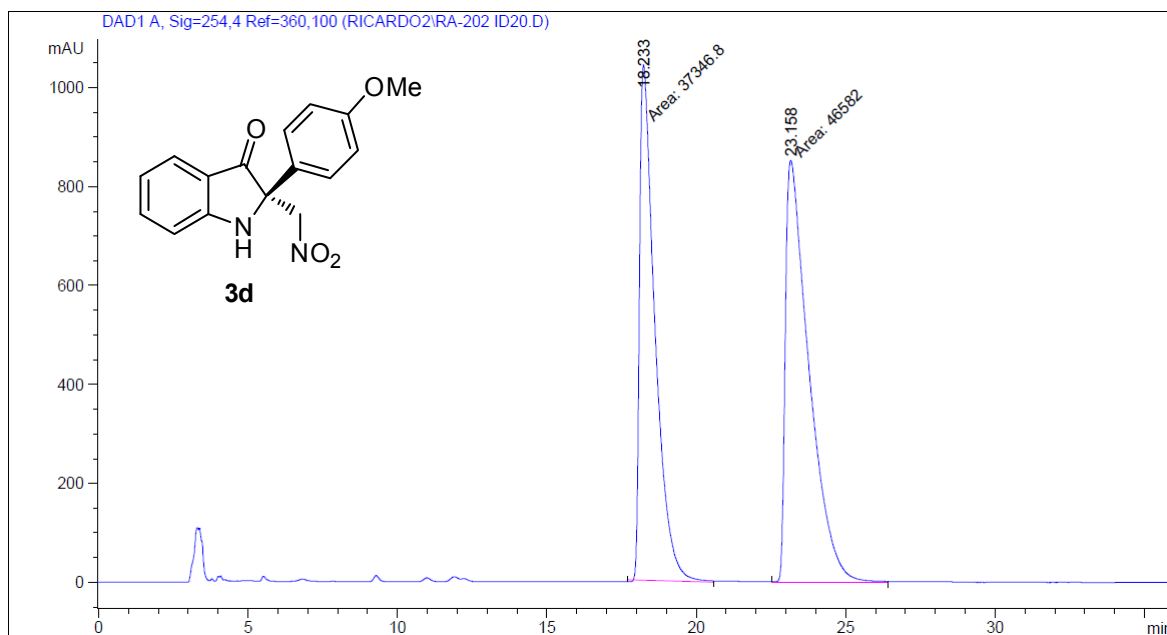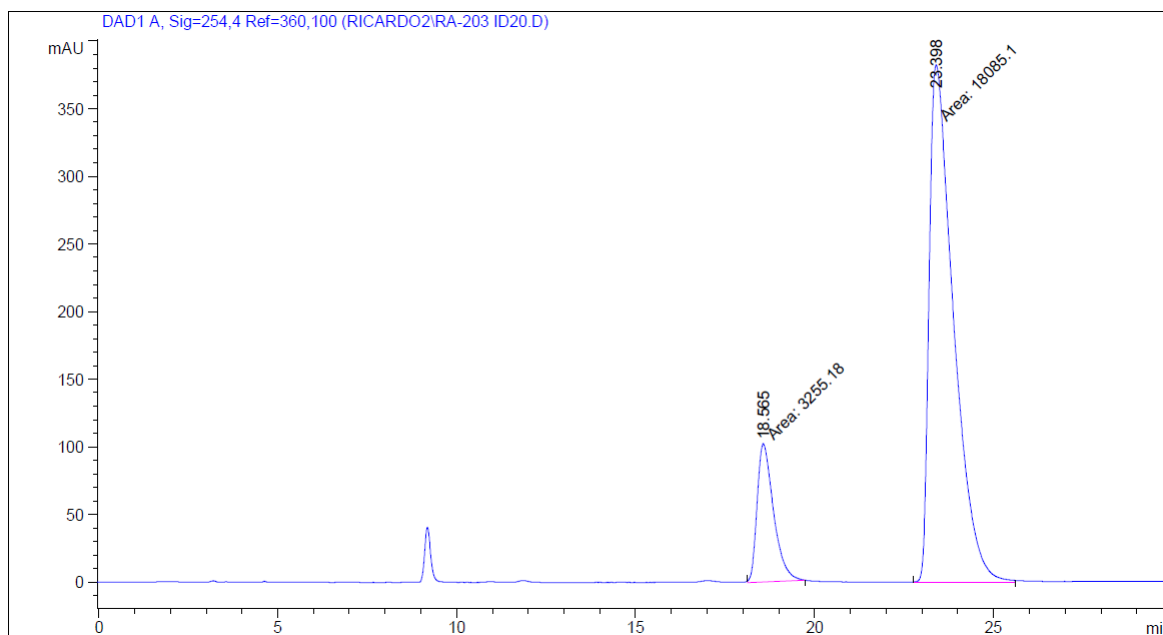

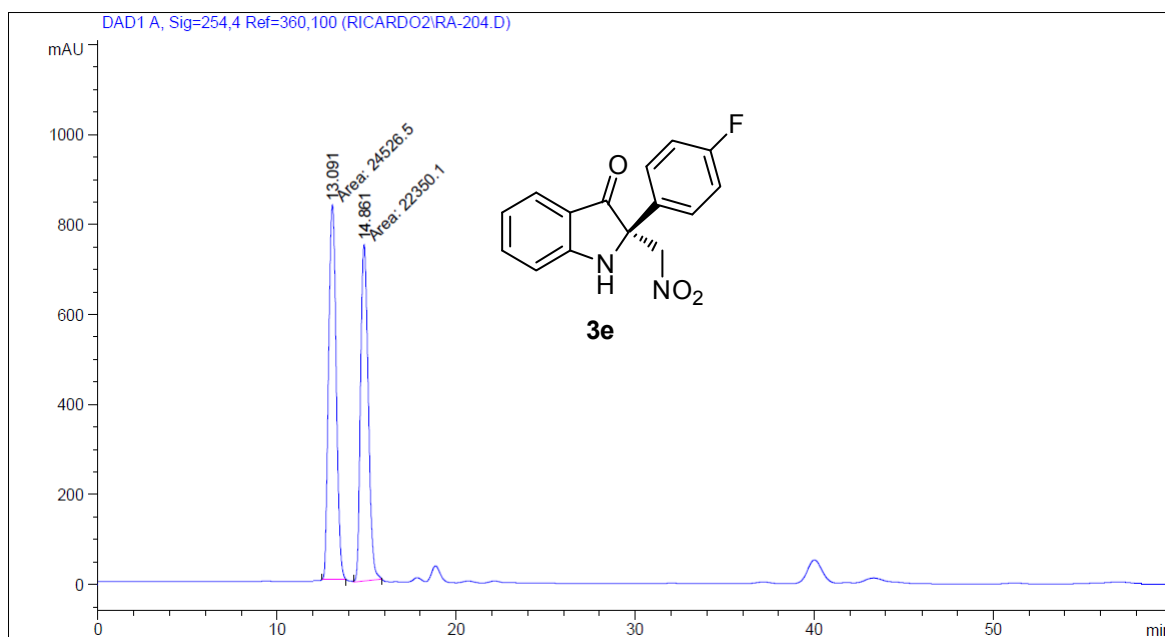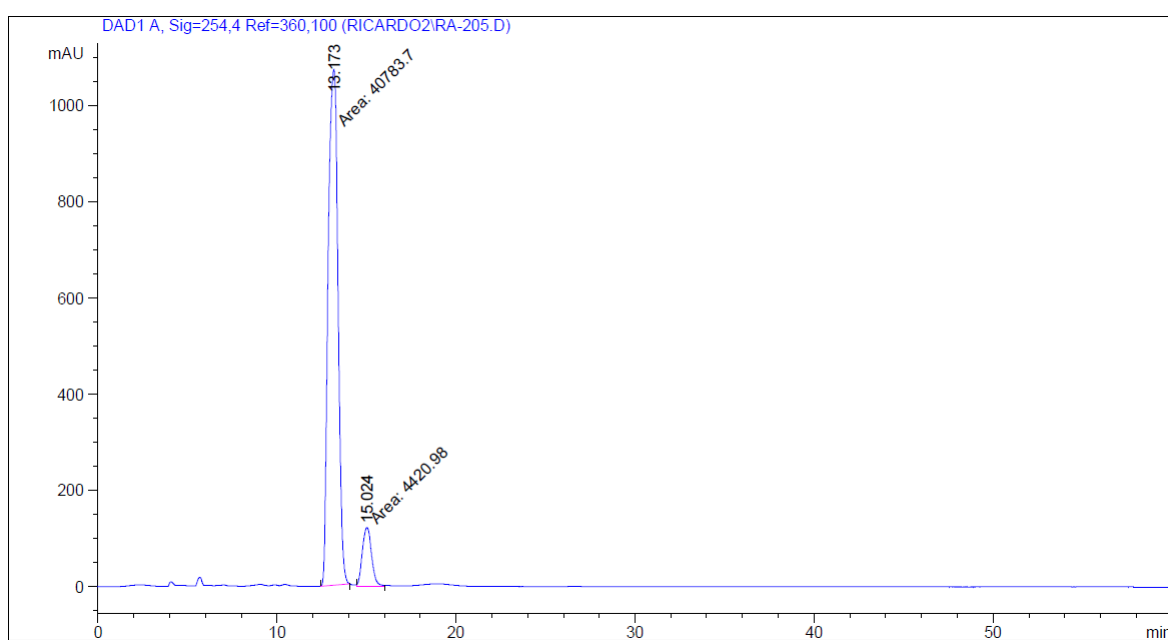

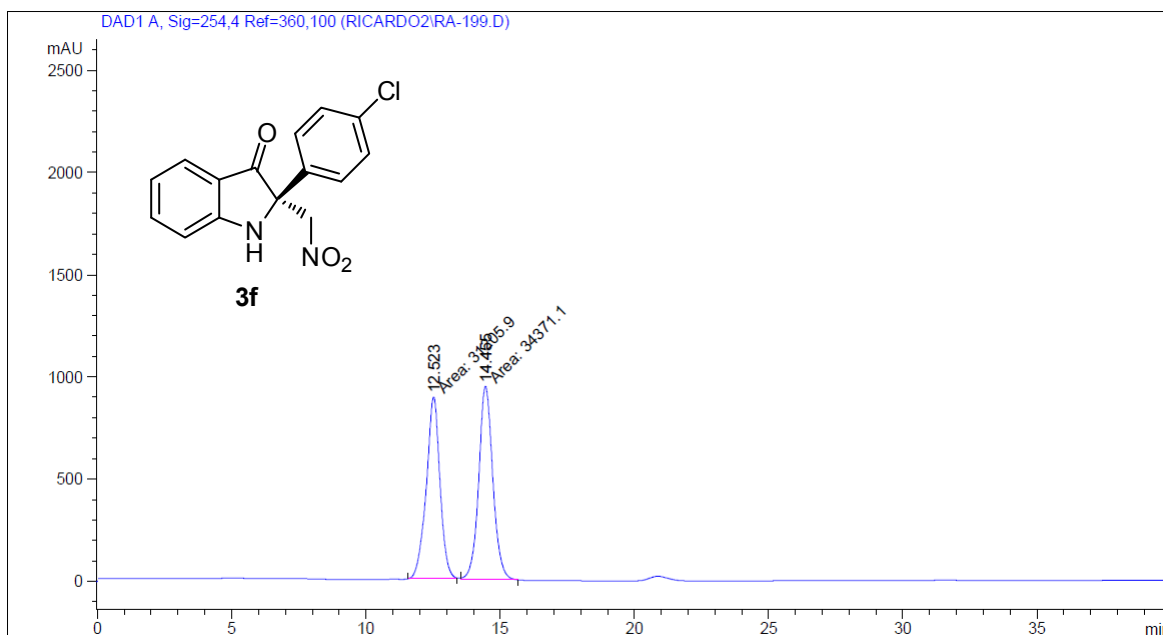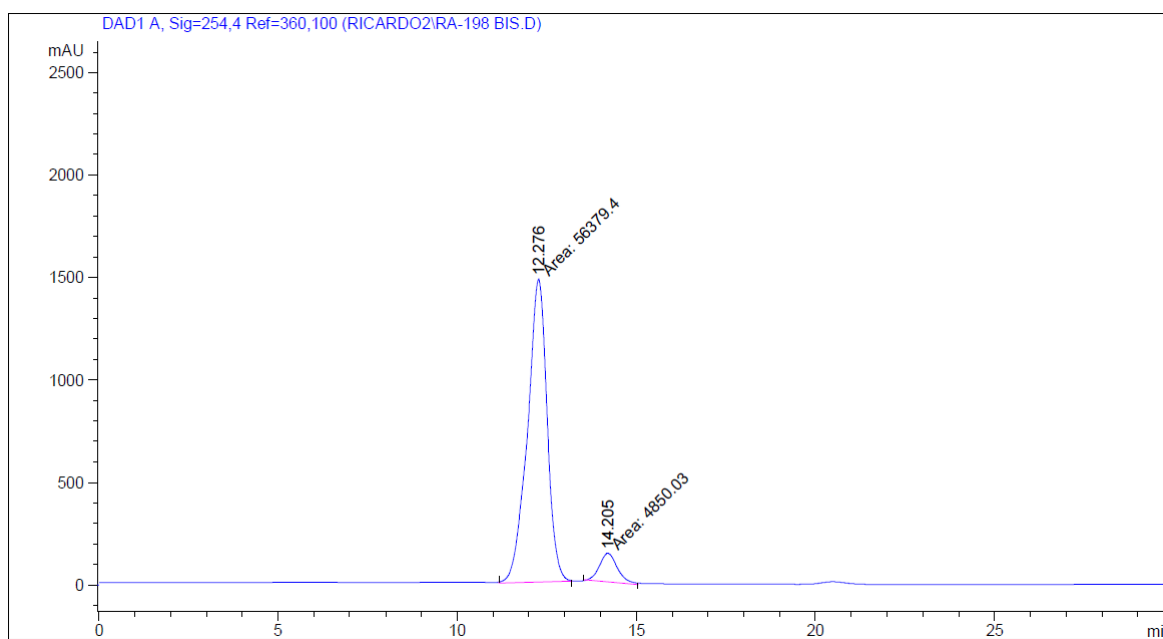

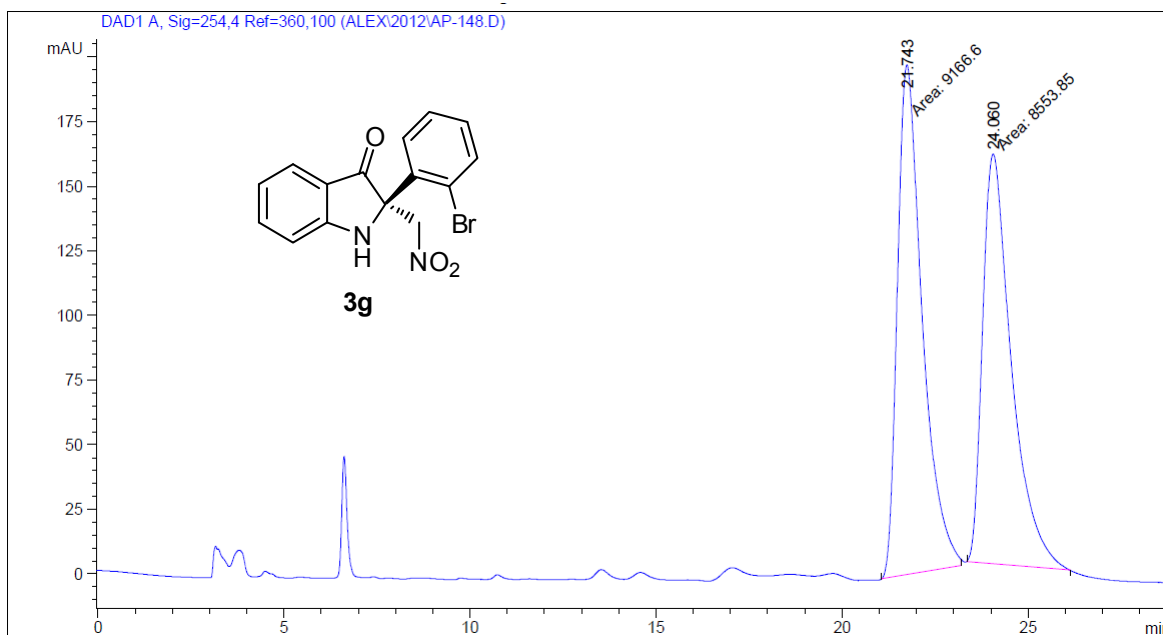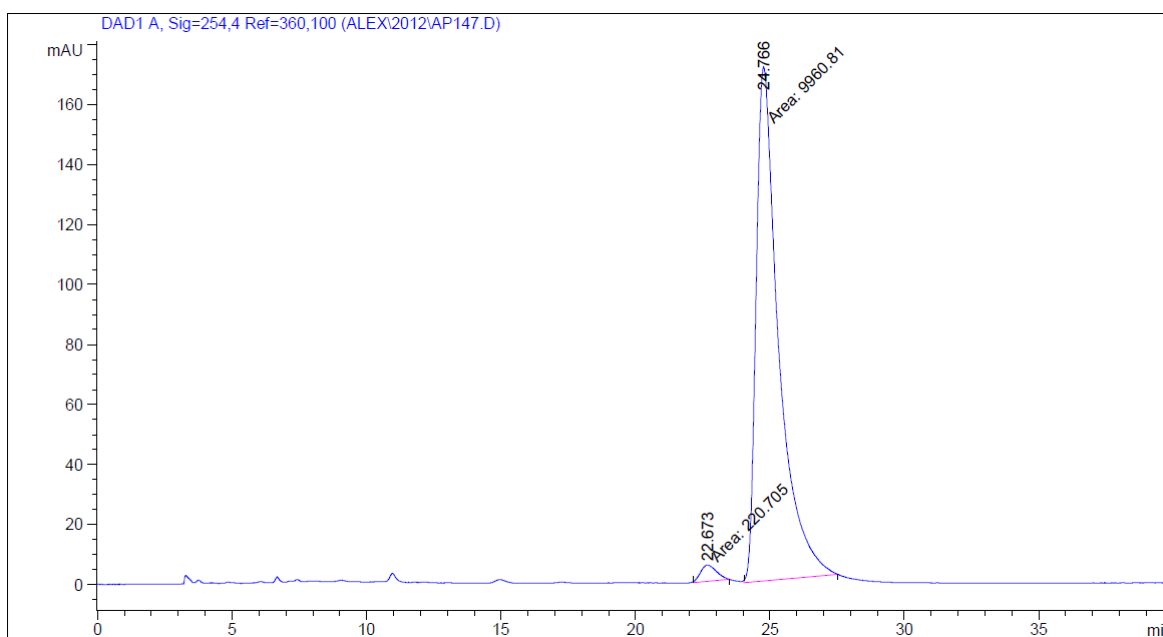

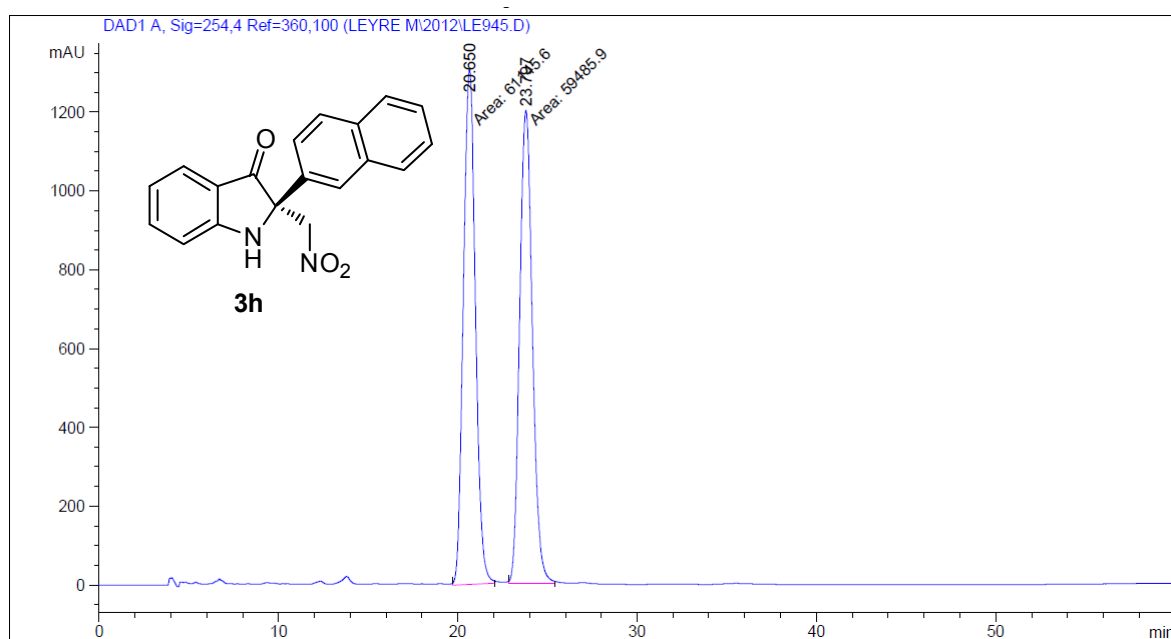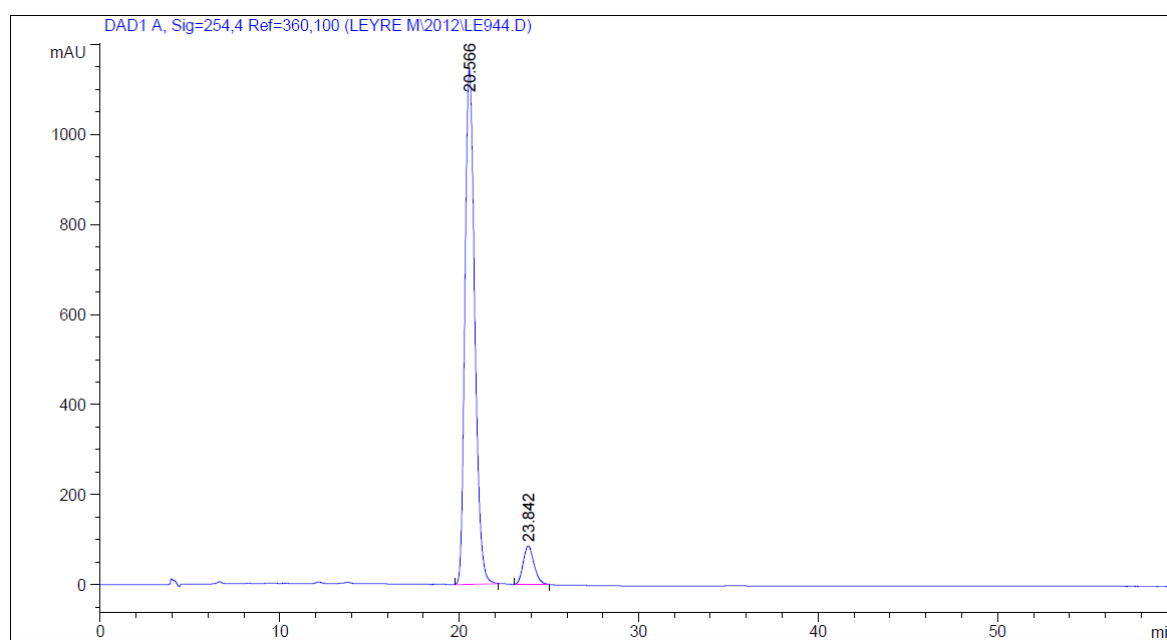

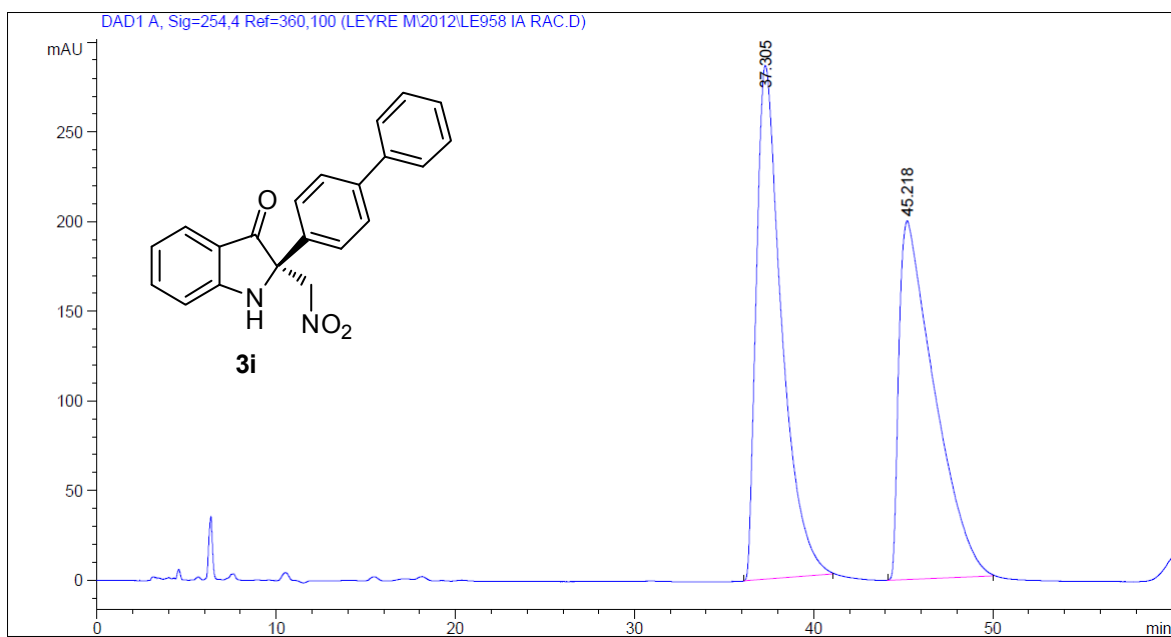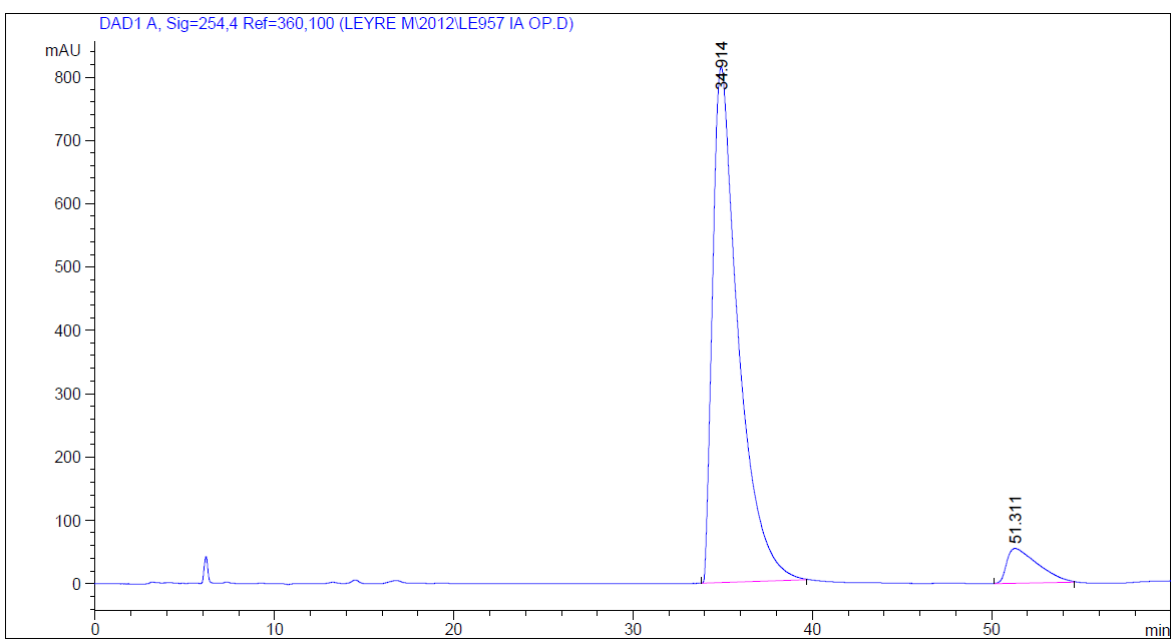

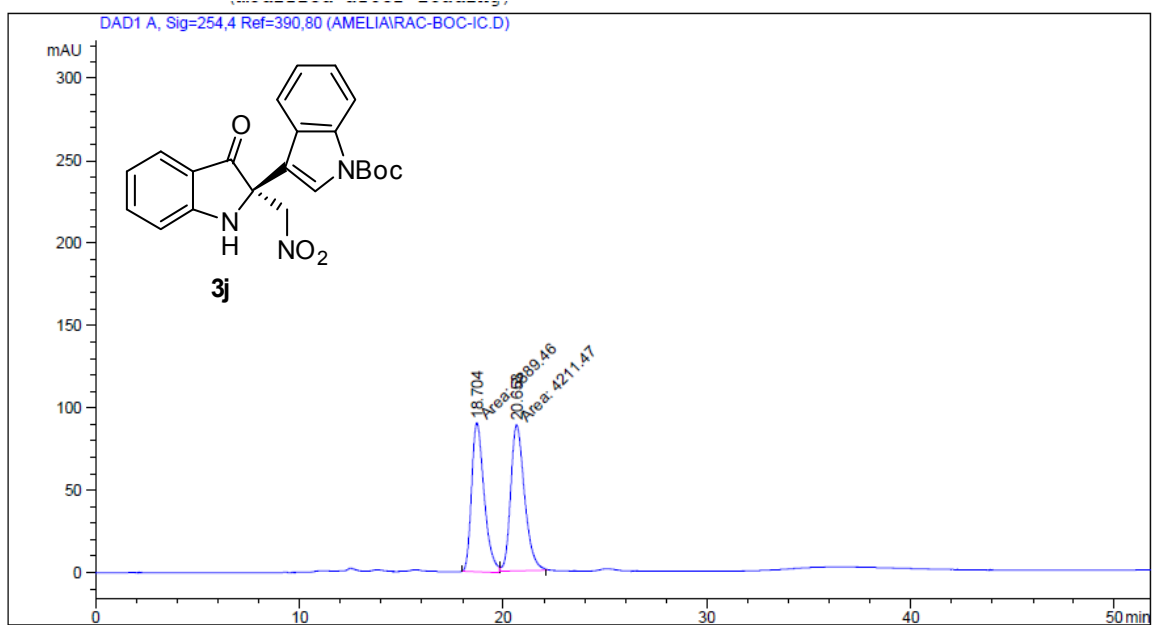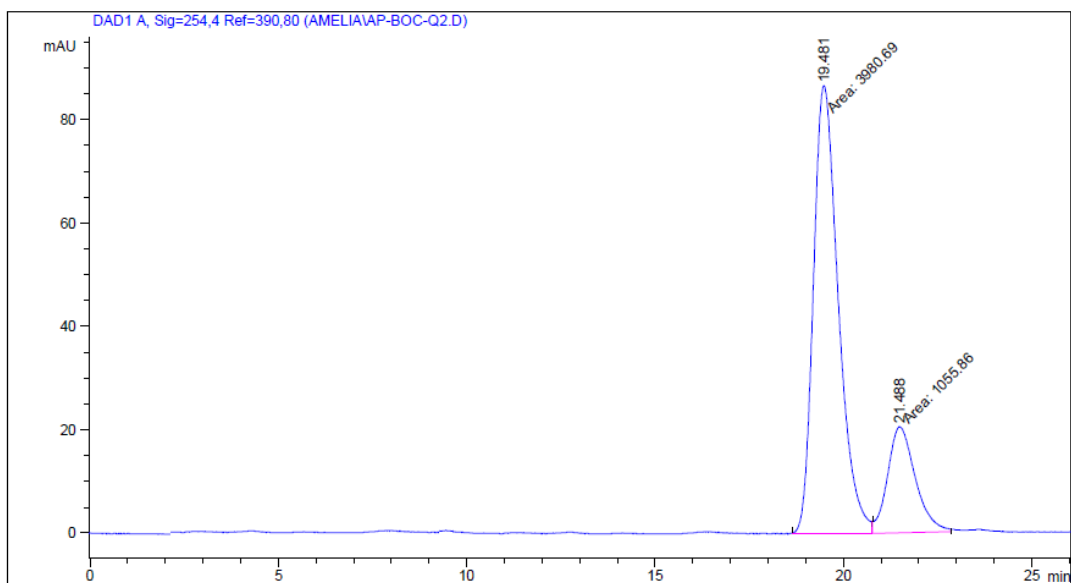

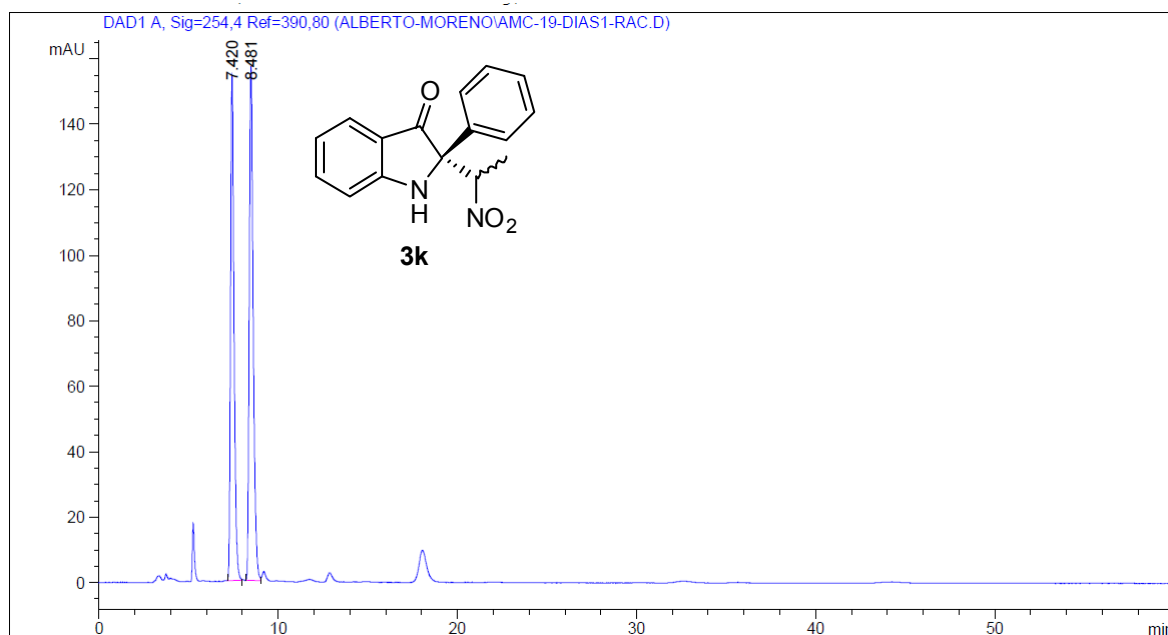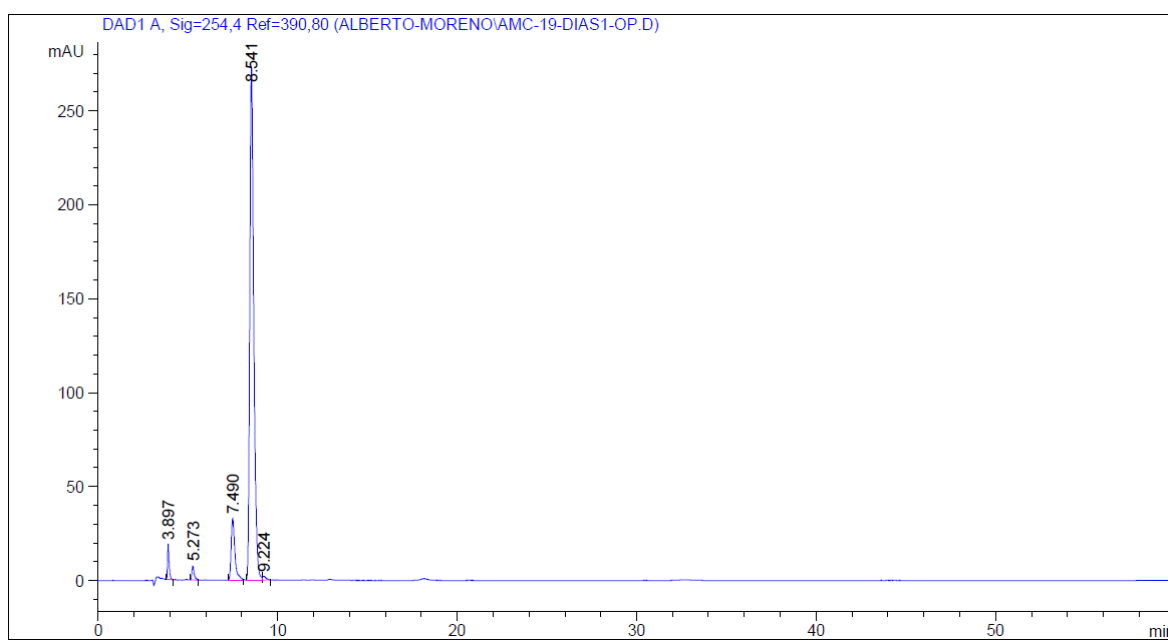



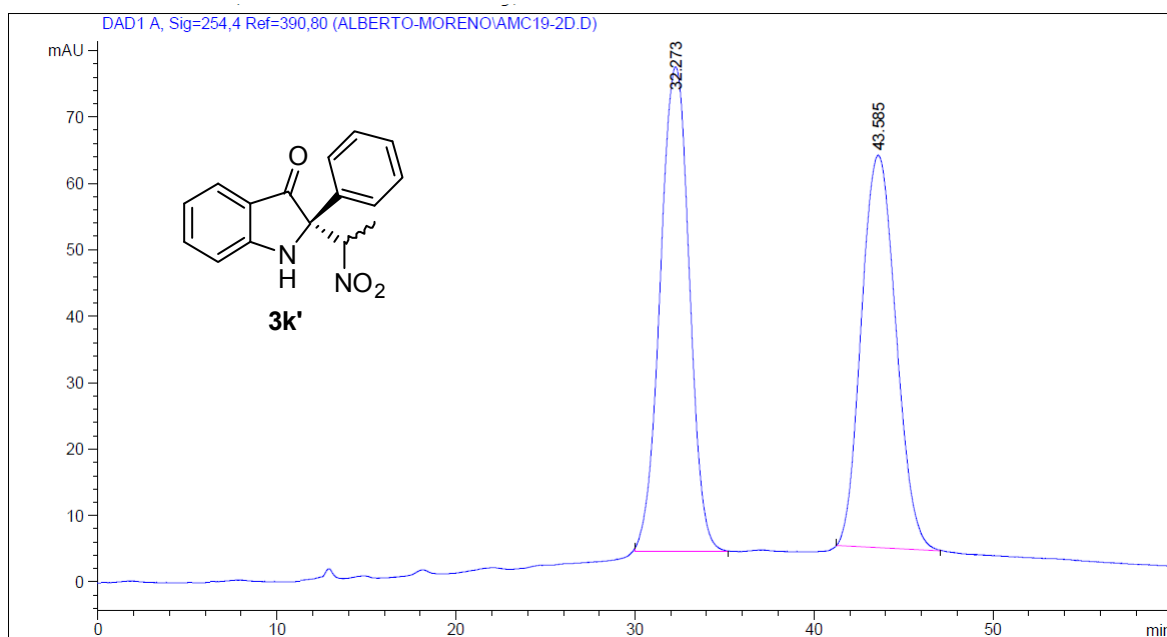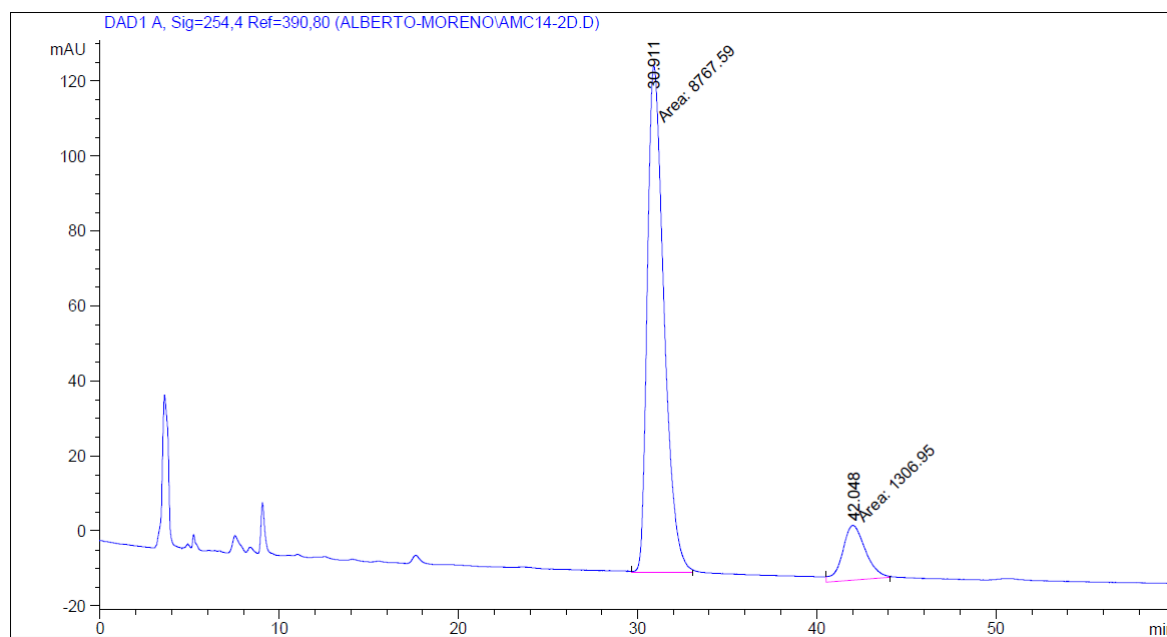

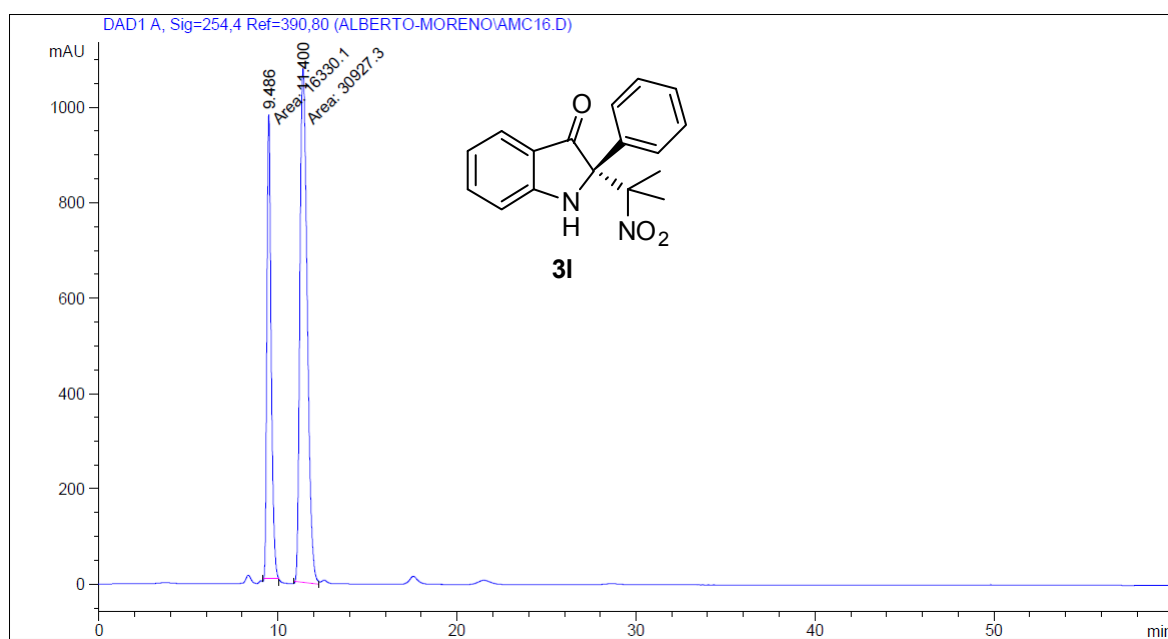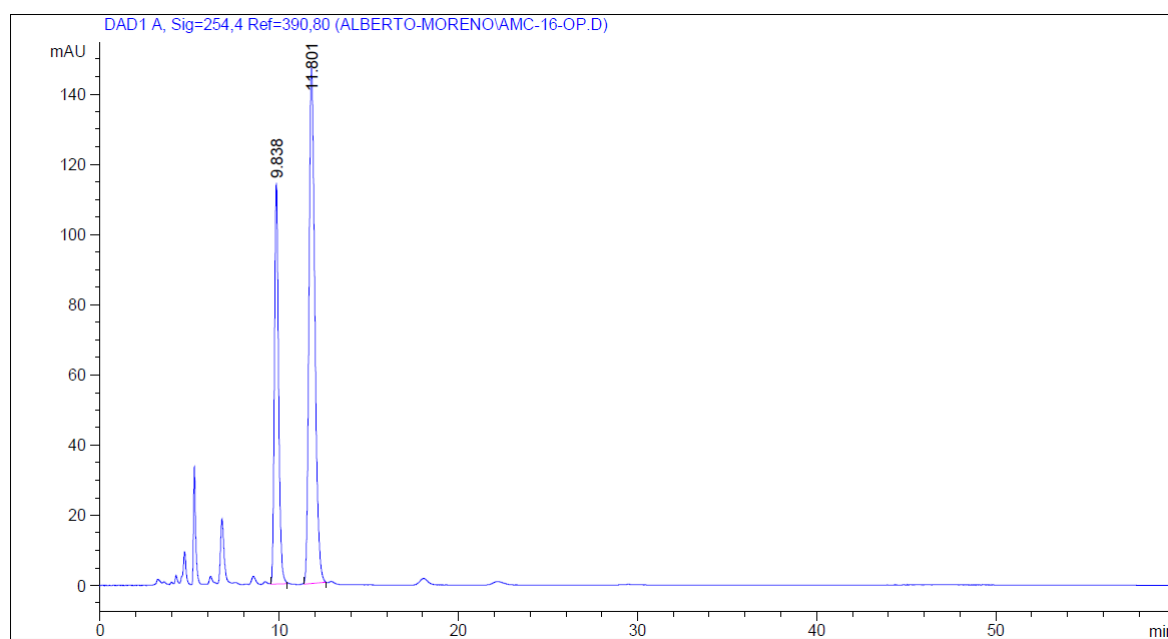

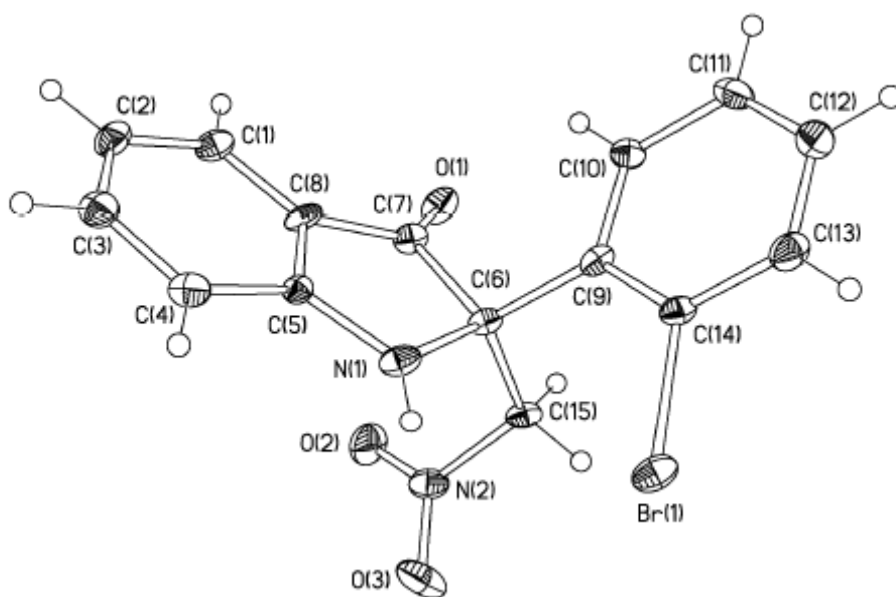

Figure 1. ORTEP of the compound **3g**.<sup>4</sup>

<sup>4</sup> The structure of a compound derived **3g** was determined by X-ray crystal analysis. Complete structural data have been deposited at the CCDC (CCDC 884937).
